# Supplementary material
Source: MDPI journal article supplement (https://www.mdpi.com/2075-163X/14/5/457)
Supplement: s1 [file s1]

Archive with 2 entries (2 files):
- Supplementary_File_S1_Figures_updated.pdf
- Supplementary_File_S2_XRF_ICP-MS_data_updated.xlsx
