# Supplementary material
Source: MDPI journal article supplement (https://www.mdpi.com/2075-163X/14/5/457)
Supplement: s1 [file s1 › Supplementary_File_S1_Figures_updated.pdf]

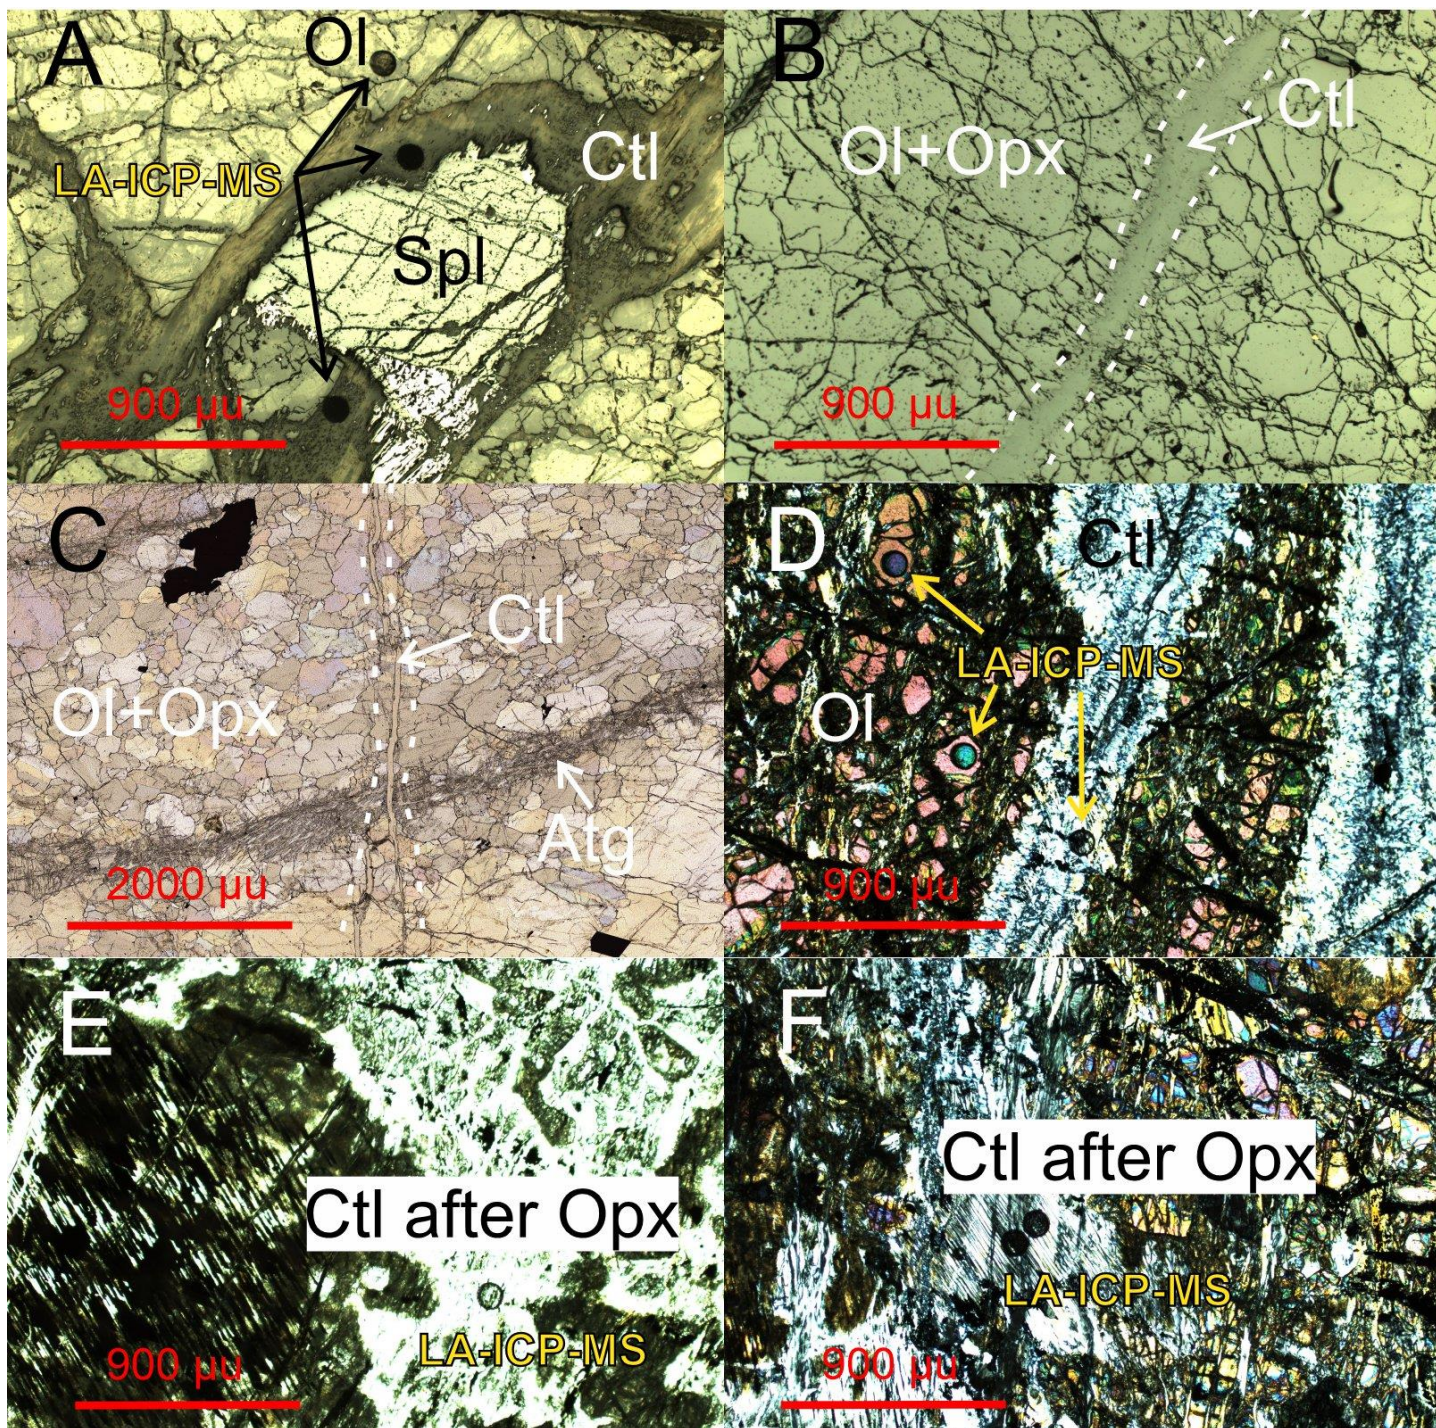

Figure S1. Transmitted and reflected light images of polished slices of metaperidotite KN (A-C) and AK (D-F). A – LA-ICP-MS holes on primary Olivine (upper) and Ctl (two others); B – Ctl vein in Ol+Opx matrix; C – Crosscutting of Ctl vein of earlier Atg assemblage; D – LA-ICP-MS holes on primary Olivine (two left holes) and Ctl (one right hole); E and F – replacement by chrysotile of orthopyroxene grains with preservation of the primary texture of the latter.

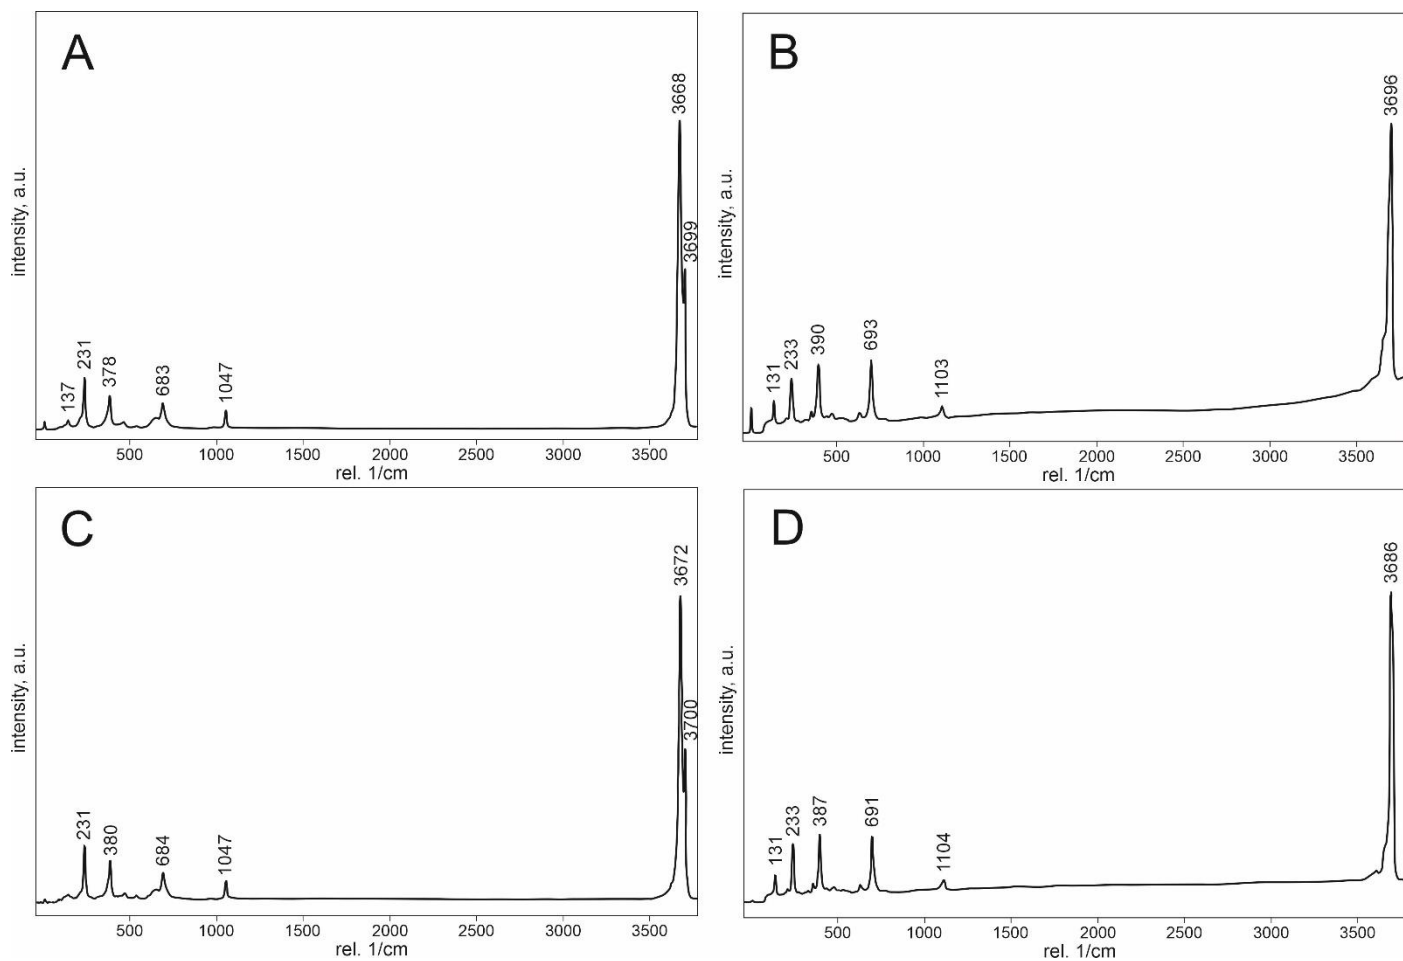

Figure S2. Representative Raman spectra of serpentines. Khara-Nur massif: A – antigorite, B – chrysotile. Alag-Khadny massif: C – antigorite, D – chrysotile.

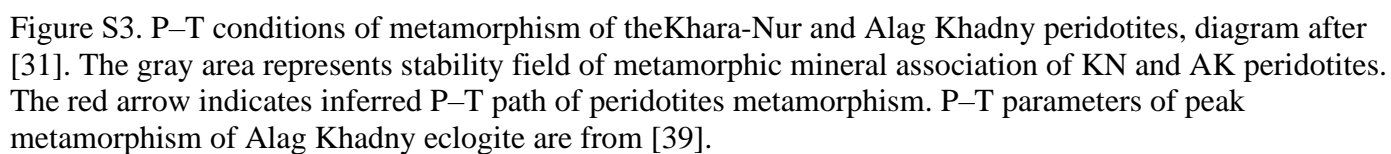

Figure S3. P–T conditions of metamorphism of the Khara-Nur and Alag Khadny peridotites, diagram after [31]. The gray area represents stability field of metamorphic mineral association of KN and AK peridotites. The red arrow indicates inferred P–T path of peridotites metamorphism. P–T parameters of peak metamorphism of Alag Khadny eclogite are from [39].
