# Supplementary material
Source: MDPI journal article supplement (https://www.mdpi.com/2075-163X/14/5/457)
Supplement: s1 [file s1 › Supplementary_File_S2_XRF_ICP-MS_data_updated.xlsx]

## Sheet: Whole-rock
Object	Alag-Khadny															Khara-Nur
Sample	М16-02	М16-03	М16-03/1	М16-07	М16-08	М16-11	М16-12	М16-17	М16-17/1	М16-18	М16-20	М16-29	М16-45	М16-48	AK LOD*	S12-26	S12-27	S12-28/1	S18-12	S18-15	S18-18	S18-121	S18-125	S18-126	S18-127	S18-128	S18-131	S18-133	S18-134	KN LOD*
Rock type*	Srp-Hz	Srp-Pxt	Ol-Atg-Di	Srp-Pxt	Ol-Atg-Di	Ol-Atg-Di	Ol-Atg-Di	Srp-Hz	Srp-Pxt	Ol-Atg-Di	Ol-Opx-Tr	Ol-Atg-Di	Ol-Tr	Ol-Tr		Ol-Atg-Di	Hz	Hz	Hz	Ol-Opx-Tr	Ol-Atg-Di	Ol-Atg-Di	Ol-Tr	Ol-Opx-Tr	Ol-Tr	Ol-Tr	Hz	Srp-Dn	Ol-Atg-Di
SiO2	43.9787	47.7843	44.0342	46.0213	42.5061	43.5295	44.762	45.3405	46.6527	45.7545	44.4409	44.5639	43.9148	43.8779	-	42.5037	44.9218	43.6017	40.1485	43.9503	47.2525	44.0157	43.7577	43.4024	44.9634	45.7939	44.0425	40.4847	46.2923	-
TiO2	0.0332842	0.100993	0.0424323	0.0344619	0.0119338	0.0728918	0.0169653	0.04875	0.237829	0.0418646	0.0343688	0.0129443	0.00812404	0.0118495	-	-	-	-	0.00359218	0.00174558	0.0329523	-	0.00174756	0.026004	0.00544256	0.00358666	0.00202185	0.00293289	0.00288235	-
Al2O3	0.886016	5.35808	1.19164	1.22691	0.652021	1.52361	1.23145	1.52297	7.28779	1.62633	1.14372	1.08976	1.21884	1.1027	-	0.613684	0.828006	0.478811	0.467209	0.25056	1.70898	0.272316	0.345274	0.325386	0.565187	0.727177	0.379314	0.34343	0.493036	-
Сr2O3	0.484299	0.244132	0.522313	0.422257	0.214154	0.355941	0.452832	0.0775115	0.244427	0.579024	0.404775	0.420059	0.389299	0.446457	-	0.474869	0.422383	0.364096	0.847447	0.443092	0.293156	0.453542	0.445431	0.572593	0.441043	0.463062	0.428421	-	0.605501	-
FeO	7.87557	4.84867	7.88871	6.93019	8.46328	8.18666	8.03375	6.90329	5.62116	7.68823	7.45832	8.08577	7.72362	7.92418	-	7.25374	7.07296	7.36171	8.69131	7.28108	3.25209	7.66048	8.01327	7.50455	7.58175	7.08684	8.25262	9.16836	5.44391	-
MnO	0.111701	0.0836538	0.134004	0.106881	0.123678	0.135385	0.110459	0.0529128	0.133144	0.0844118	0.130018	0.148554	0.153294	0.129355	-	0.143602	0.112728	0.114715	0.133053	0.108242	0.0397701	0.110344	0.124822	0.116571	0.114229	0.104737	0.1211	0.132246	0.0949701	-
MgO	46.1054	27.9118	45.5802	44.0395	47.0453	42.8067	44.797	43.9314	24.6796	43.2807	45.4646	43.7746	44.5109	45.0623	-	48.5068	45.9154	47.3963	49.2103	47.3369	46.3446	46.6339	46.3407	47.8432	45.4016	44.5522	45.9508	48.7179	46.6285	-
CaO	0.183276	13.5032	0.262471	0.876203	0.675889	3.10032	0.294192	1.86805	15.0006	0.620145	0.593897	1.5964	1.77306	1.14617	-	0.126419	0.423979	0.357113	0.162508	0.327733	0.221576	0.560578	0.680954	0.127479	0.634663	0.999523	0.493308	0.178832	0.150626	-
NiO	0.341798	0.165202	0.343985	0.342317	0.307605	0.288951	0.301274	0.254519	0.142682	0.324723	0.329399	0.308004	0.30807	0.299098	-	0.377139	0.302721	0.325591	0.336021	0.300369	0.854319	0.275973	0.290066	0.0817559	0.292748	0.268989	0.297878	0.310792	0.288223	-
L.O.I.	7.77	6.47	10.98	10.98	9.53	5.52	9.18	13.33	6.85	11.28	9.33	8.37	8.07	6.12	-	19.09	0.41	0.41	0.96	4.23	12.73	5.43	3.92	4.42	4.68	6.29	-0.08	1.89	12.3	-
Sb (ppm)	0.0381941	0.0914796	0.0614727	0.0221186	0.00895326	0.185683	0.0221974	0.0539245	0.0966546	0.0277106	0.0204884	0.020668	-	0.0211511	0.0192109	b.d.l.	0.0382824	b.d.l.	0.0259513	0.0287484	0.0617864	0.0192878	0.0379555	0.0229221	0.0070756	0.0102158	0.0694043	0.0255202	b.d.l.	0.0143902
Cs	0.0643342	0.285122	0.0113974	0.0758201	0.0130088	0.0627418	0.0657888	0.0243082	0.423519	0.182371	0.0525037	0.0627822	-	0.091188	0.00519867	0.370556	0.0158389	b.d.l.	0.0039097	0.0330659	0.0220221	0.00342139	0.0104279	0.01328	0.049275	0.0647459	0.00710921	0.0082822	0.00599159	0.00510243
Rb	0.294912	2.7584	0.220647	1.4409	0.168664	0.722209	2.19096	0.307223	3.83576	0.753226	0.825301	1.27158	-	1.33075	0.0177229	0.524964	0.339122	1.52561	0.0450454	0.370606	0.235815	0.0401809	0.0523664	0.0365868	0.448579	0.391981	0.0707184	0.0476519	0.027027	0.0237163
Ba	3.71586	22.3622	4.12722	4.29883	1.48791	3.93144	3.85751	4.26361	20.0127	3.21252	1.47346	11.457	-	6.2138	0.25755	3.9095	1.89296	3.39345	0.489181	0.925821	0.726929	0.200201	0.523695	0.606803	1.40615	1.3332	0.555751	0.668334	1.58442	0.408416
Th	0.0779459	1.24671	0.123546	0.0485004	0.0374697	0.124844	0.0548198	0.0547416	0.446636	0.116317	0.018373	0.0549391	-	0.105937	0.00225784	0.031003	0.0136656	0.0242188	0.00637674	0.0303819	0.145474	0.0033394	0.00794737	0.00763369	0.0178209	0.00506751	0.0104631	0.00591538	0.00388305	0.0175944
U	0.0395294	0.271861	0.0629846	0.0204656	0.0116984	0.0365984	0.0198152	0.0528977	0.473383	0.0624812	0.0147894	0.0187552	-	0.0261274	0.000996378	0.00406225	0.00400374	0.0177413	0.00343151	0.00229744	0.0376695	0.000285254	0.00221883	b.d.l.	0.00508248	0.00238804	0.00661457	b.d.l.	0.00705977	0.0110051
Nb	0.0774292	1.71215	0.764344	0.279354	0.0389515	0.238025	0.0560595	0.344261	4.42864	0.516722	0.0357636	0.120202	-	0.154142	0.0235722	0.045122	0.0451625	0.388602	0.0491516	0.0475967	2.0047	0.0206992	0.101254	0.0439032	0.173655	0.0877246	0.079302	0.0890463	0.0407576	0.46891
Ta	0.0157367	0.686989	0.0869117	0.0296456	0.0169406	0.0303434	0.0130362	0.0494494	1.2084	0.0550544	b.d.l.	b.d.l.	-	b.d.l.	0.0802473	0.00805613	0.0136514	0.035749	0.0519269	0.040051	0.0813733	0.0179405	0.0292565	0.046284	0.0303519	0.0301481	0.0279885	0.0385007	0.0152538	0.243315
Pb	0.38985	4.3508	0.370723	0.363288	0.580235	0.407687	0.104517	0.328522	0.428511	0.424272	0.226971	0.19627	-	0.181197	0.143161	0.817773	0.0645331	0.119532	0.0679035	0.114854	0.341715	0.0310138	0.0155852	0.0545214	0.0823755	0.188959	0.0480934	0.0720052	0.243677	0.14629
Sr	4.0205	88.3706	7.12216	6.1528	3.29286	9.91728	6.31379	13.0175	79.7072	5.98548	3.29997	10.7397	-	12.8523	0.200265	3.00893	0.642695	0.381695	0.275164	0.891413	1.07473	1.00414	0.786342	0.401342	1.30614	1.88243	0.342968	0.218598	0.161906	0.201533
Zr	1.03463	24.9141	2.81601	0.677402	0.323191	3.19965	0.696308	1.58978	22.8749	1.80888	0.574841	0.648898	-	0.829557	0.183988	0.41214	0.434648	1.18256	0.0576826	0.183401	5.88483	0.0859113	0.187174	0.0722746	0.265053	0.0722261	0.213648	0.057396	0.0689437	0.0863335
Sn	0.121521	0.432071	0.0585619	0.0705154	0.0391659	0.111858	0.0841171	0.069652	0.699895	0.0601325	0.0614872	0.0628921	-	0.0552589	0.24705	0.114962	0.0860875	b.d.l.	0.036599	0.0962092	0.093566	0.0545827	0.0809923	0.0314667	0.0380989	0.0406264	0.126315	0.0137898	0.022181	0.0475599
Ti	193.782	854.711	225.358	192.977	31.7043	439.613	99.1904	274.079	2145.87	236.167	158.115	63.8429	-	70.68	1.89728	12.9854	23.0192	53.1868	19.5217	15.1964	195.796	6.63939	9.95178	14.0823	24.7744	13.7911	9.6289	12.0859	12.9841	1.67383
Y	0.266494	17.0475	0.475592	0.20854	0.108264	1.22524	0.307804	0.475468	34.4824	0.862392	0.172334	0.179514	-	0.211152	0.00639562	0.0287434	0.123632	0.117728	0.0196058	0.0403517	1.35332	0.0161956	0.0456075	0.0295193	0.0820454	0.0329388	0.0445562	0.0233726	0.0375142	0.00382508
Yb	0.0347661	1.39335	0.0419235	0.024157	0.0196924	0.148039	0.0614606	0.0534102	2.26356	0.113172	0.018735	0.0401253	-	0.0320043	0.00448208	0.0112491	0.00251211	0.0231185	0.0107223	0.00727758	0.153452	0.00678548	0.00931417	0.0163602	0.0143646	0.00739667	0.00809676	0.00818598	0.0067313	0.00290157
Sc	4.81404	18.7404	5.95399	7.34525	6.82212	12.5398	11.2923	4.40638	31.1638	12.511	6.66326	9.78125	-	10.2935	0.00703714	8.4095	7.06329	6.31973	5.11958	5.35358	5.03339	6.46821	9.11096	5.93125	6.84828	7.42256	8.39925	4.8374	7.05145	0.00833669
Co	125.252	54.5791	135.116	116.016	126.92	118.963	116.507	75.1087	51.8408	117.55	108.099	108.29	-	116.095	0.043475	101.893	118.588	b.d.l.	148.761	122.42	85.9371	116.682	112.927	120.922	109.452	108.978	123.067	139.565	96.2032	0.383747
Ni	2555.6	1197.63	2407.12	2262.25	2464.18	2159.8	2160.33	1307.8	1092.97	2331.05	2179.91	1999.02	-	2266.32	0.707664	2151.12	2454.46	b.d.l.	2879.17	2839.5	5908.45	2734.14	2500.83	2666.53	2525.68	2536	2741.27	2763.38	2407.17	0.352795
La	0.174795	5.41414	0.440487	0.148867	0.169853	0.349515	0.118475	0.19419	4.58257	0.524094	0.0688203	0.125996	-	0.205625	0.0131775	0.0987242	0.0579118	0.0366988	0.0198566	0.125921	0.826348	0.0227516	0.0442728	0.022223	0.0911733	0.0434336	0.0689053	0.0149157	0.0440137	0.0307257
Ce	0.364682	19.0911	0.99477	0.313941	0.346069	0.749979	0.258137	0.569257	17.3964	1.34028	0.126868	0.237383	-	0.406245	0.0255622	0.165718	0.124686	0.0766926	0.0244959	0.181578	1.50159	0.0197721	0.0591838	0.023493	0.156355	0.0340879	0.127236	0.011652	0.0578718	0.0618154
Pr	0.0429354	3.19972	0.134297	0.0367214	0.037682	0.105756	0.0280845	0.0812809	3.19088	0.196107	0.0265582	0.0291274	-	0.0426832	0.00261213	0.0165381	0.0145845	0.0103116	0.00283941	0.0163928	0.148512	0.000880268	0.00583832	0.00280589	0.0130875	0.00264577	0.00871146	0.00143614	0.00465911	0.00464832
Nd	0.152329	15.6702	0.492249	0.1356	0.129463	0.449263	0.103219	0.361068	16.0549	0.789648	0.074393	0.103713	-	0.151573	0.0114258	0.0506472	0.0607435	0.0357558	0.00794621	0.0556351	0.609563	0.00785155	0.0290591	0.00762669	0.055893	0.00628093	0.0291849	0.00702063	0.0130193	0.0288098
Sm	0.0385696	4.70507	0.118208	0.024839	0.0227892	0.13721	0.0252422	0.107713	6.31686	0.202285	0.0164652	0.0224292	-	0.0292206	0.00211303	0.00788827	0.0161557	0.00732374	0.00338241	0.00975016	0.137816	0.00183727	0.00502832	0.00395953	0.012077	0.00284746	0.00846366	0.00260922	0.00574953	0.00255698
Eu	0.01188	0.90541	0.0433898	0.0130805	0.00960748	0.0356035	0.00703056	0.0340286	1.05726	0.0438562	0.0136604	0.00586886	-	0.00584312	0.000568489	b.d.l.	0.00287529	0.00292434	0.000894299	0.00153047	0.014806	0.000761297	0.00160984	0.000581591	0.00284479	0.000576884	0.00133437	0.000533388	0.000659164	0.00184429
Gd	0.0439324	4.55543	0.135569	0.038629	0.0218466	0.205044	0.0396451	0.128105	7.25068	0.223449	0.0261166	0.0329799	-	0.0272938	0.00231771	0.00581253	0.0170389	0.00790008	0.00244681	0.00472112	0.171156	0.00135958	0.0054256	0.00312071	0.00785597	0.00182524	0.00634887	0.00200976	0.00593278	0.00727558
Tb	0.0088286	0.602648	0.0180472	0.00573061	0.00282477	0.0361533	0.00691294	0.0171074	1.17081	0.0287412	0.00529071	0.00443459	-	0.00491306	0.000375121	0.000527069	0.00237908	0.00140042	0.000579658	0.00140359	0.0256625	0.000421445	0.000937315	0.000944307	0.00165874	0.000636438	0.00140084	0.000334974	0.00093572	0.000907529
Dy	0.0524624	3.32988	0.0974377	0.0378329	0.0187519	0.226274	0.0533245	0.0989093	6.66467	0.173661	0.0274947	0.0319476	-	0.0321272	0.00122156	0.0044092	0.0199876	0.0114815	0.00277976	0.00472296	0.181821	0.00241174	0.0057184	b.d.l.	0.0107794	0.00367832	0.0113123	0.00114921	0.00439388	0.00232465
Ho	0.00926559	0.592775	0.0177853	0.00769532	0.00359257	0.0486212	0.0108232	0.0174625	1.21748	0.0310579	0.0070387	0.00622327	-	0.00728393	0.000222573	0.000998762	0.004503	0.00336003	0.000683824	0.00179696	0.038666	0.000571739	0.00155834	0.00127411	0.00201451	0.000997013	0.00155316	0.00047539	0.00120679	0.000298396
Er	0.0254915	1.65367	0.0502258	0.0241349	0.0122648	0.153277	0.0437636	0.0569705	3.1953	0.101772	0.0267014	0.0205527	-	0.0255193	0.000400135	0.00368735	0.0139936	0.0203756	0.00231587	0.00360931	0.129298	0.00157972	0.00465989	0.0053292	0.00761192	0.00219919	0.00424798	0.0013519	0.00320484	0.00190033
Tm	0.00421647	0.210749	0.00718034	0.00323899	0.00305099	0.0227776	0.00713206	0.00778564	0.399073	0.0148858	0.00381761	0.00506033	-	0.00484858	0.000180791	0.00101902	0.0014009	0.00303949	0.000526362	0.000668206	0.0193647	0.000511702	0.000656362	0.000955032	0.00130362	0.000827578	0.000966557	0.000739832	0.000627902	0.000325887
Yb	0.0347661	1.39335	0.0419235	0.024157	0.0196924	0.148039	0.0614606	0.0534102	2.26356	0.113172	0.018735	0.0401253	-	0.0320043	0.00448208	0.0112491	0.00251211	0.0231185	0.0107223	0.00727758	0.153452	0.00678548	0.00931417	0.0163602	0.0143646	0.00739667	0.00809676	0.00818598	0.0067313	0.00290157
Lu	0.00561878	0.203513	0.00821193	0.00597525	0.00472086	0.0256918	0.0128034	0.0084096	0.311828	0.0181671	0.00521101	0.00737674	-	0.00784524	7.34631e-05	0.00261621	0.0212663	0.00497427	0.00153038	0.00143734	0.0244797	0.00201379	0.00313824	0.00227279	0.00286509	0.00230913	0.00191136	0.00158292	0.00196652	0.000153784
Rock type: Hz - harzburgite, Dn - dunite, Srp - serpentine, Ol-Atg-Di - olivine antigorite diopside rock, Ol-Opx-Tr - olivine orthopyroxene tremolite rock;
Note: Oxiedes in wt. %, other values in ppm; L.O.I. - loss on ignition; AK LOD - Limit of detection for Alag-Khadny samples; KN LOD - limit of detection for Khara-Nur samples; b.d.l. - bellow detection limit;

## Sheet: In situ trace elements
Alag-Khadny	Primary Olivine															Primary Orthopyroxene												Antigorite after Olivine									Antigorite after Orthopyroxene			Chrysotile after Olivine							Chrysotile after Orthopyroxene
Sample No	M16-03/1-04	M16-45-04	M16-48-01	M16-48-02	M16-48-05	M16-02-01	M16-02-02	M16-02-06	M16-08-01	M16-08-02	M16-11-01	M16-11-02	LOD max	LOD min		M16-20-06	M16-20-07	M16-20-15	M16-20-16	M16-20-17	M16-20-18	M16-20-19	M16-11-02	M16-07-05	LOD max	LOD min		M16-07-01	M16-07-02	M16-03/1-06	M16-45-03	M16-02-03	M16-02-04	M16-12-07	M16-12-08		M16-07-03	M16-17-05		M16-45-01	M16-45-02	M16-45-06	M16-29-04	M16-12-05	M16-12-06		M16-29-06	M16-29-07	M16-29-08
Cs (ppm)	b.d.l.	b.d.l.	b.d.l.	b.d.l.	b.d.l.	b.d.l.	b.d.l.	b.d.l.	b.d.l.	b.d.l.	b.d.l.	b.d.l.	0.0014353	0.000188969		0.197021	0.128715	0.521456	0.456229	0.151732	0.215319	0.366666	0.182407	0.307709	0.000528951	0.00333096		0.00148199	0.00413335	0.00194745	0.00580824	0.0155045	0.00272073	b.d.l.	b.d.l.		0.00919048	0.116718		0.0078774	0.00282882	0.145915	0.0773073	0.00250824	b.d.l.		0.0629732	0.0612634	0.0639411
Rb	b.d.l.	b.d.l.	b.d.l.	b.d.l.	0.0111257	0.00574294	b.d.l.	0.0177994	b.d.l.	b.d.l.	b.d.l.	b.d.l.	0.00311112	0.000971486		3.30495	2.93328	9.33207	8.13748	4.68702	3.94488	7.27389	3.20003	6.30565	0.00390498	0.0142273		0.0203866	0.0178466	0.00724709	0.031336	0.0405056	0.0179959	0.0242778	0.0151921		0.0495125	0.420773		0.0310872	0.00911192	0.859902	1.09175	0.159168	0.0139427		0.376891	0.432125	0.544545
Ba	0.00809548	b.d.l.	0.0287034	b.d.l.	b.d.l.	b.d.l.	0.425127	0.0280734	0.00394907	b.d.l.	b.d.l.	b.d.l.	0.0079598	0.000471795		3.04024	3.1514	4.88801	3.6663	5.32816	3.21221	3.39173	2.49904	8.3803	0.00175181	0.0371586		0.0493229	0.0559478	1.00749	0.266042	0.517317	0.337152	0.012406	0.0272386		0.256977	0.179632		0.484835	0.316059	1.39394	5.52563	0.422796	0.145923		16.0898	9.12465	4.08202
Th	b.d.l.	b.d.l.	0.00365655	b.d.l.	b.d.l.	0.00299436	0.00629733	0.00507577	b.d.l.	b.d.l.	b.d.l.	b.d.l.	0.000206754	5.21065e-05		0.00837031	0.00740013	0.0116359	0.0113038	0.0108444	0.0190074	0.00189115	0.00815887	0.0120207	0.000189689	0.00317727		0.00866034	0.00389886	0.00312947	0.00796942	0.0251495	0.00972922	b.d.l.	b.d.l.		0.0460865	0.0238511		0.0196939	0.029158	0.0517303	0.0116348	0.000652491	b.d.l.		0.0826172	0.0468501	0.0456621
U	b.d.l.	b.d.l.	0.00219571	0.00142456	b.d.l.	0.00280687	0.00479568	0.00717432	b.d.l.	b.d.l.	b.d.l.	0.00072976	0.000470876	8.10422e-05		0.00415961	0.00792124	0.013053	0.0107017	0.00620134	0.00845719	0.00727956	0.00262302	b.d.l.	0.000165321	0.00828883		b.d.l.	0.000210618	0.00440199	0.00343874	0.0100897	0.00045442	b.d.l.	b.d.l.		0.0113861	0.0115113		0.00686138	0.00727663	0.0310533	0.00662557	0.000245309	b.d.l.		0.0230631	0.0118956	0.0169957
W	0.101761	0.00435105	0.0676886	b.d.l.	0.034936	0.0281144	0.0480273	0.120122	0.00464738	0.00499458	0.0268322	0.0214487	0.0102849	0.000241425		0.378876	0.314253	0.171311	0.819245	0.132605	0.223668	0.169217	0.102474	0.0946294	0.00101072	0.0257397		0.0518349	0.0559307	0.132113	0.0627237	0.0678786	0.0683743	0.0970545	0.102838		0.0486407	0.0202104		0.100313	0.0606615	0.0651714	0.00565961	0.0197805	0.0883414		0.0437441	0.196173	0.0395003
Nb	b.d.l.	b.d.l.	b.d.l.	b.d.l.	b.d.l.	b.d.l.	b.d.l.	b.d.l.	b.d.l.	b.d.l.	b.d.l.	b.d.l.	0.00170882	9.73596e-05		0.0127298	0.0168832	0.00719143	0.026628	0.0158775	0.0178844	0.0239905	0.0129995	0.0469184	0.000350971	0.00566803		0.0340981	0.0200583	0.0683584	b.d.l.	0.00278524	0.00212911	b.d.l.	b.d.l.		0.207088	0.161325		0.00377002	0.00935299	0.0116183	0.0731606	b.d.l.	b.d.l.		0.356369	0.212172	0.278582
Ta	b.d.l.	b.d.l.	b.d.l.	b.d.l.	b.d.l.	b.d.l.	b.d.l.	b.d.l.	b.d.l.	b.d.l.	b.d.l.	0.000317023	0.000546976	4.39764e-05		b.d.l.	b.d.l.	b.d.l.	b.d.l.	b.d.l.	b.d.l.	b.d.l.	b.d.l.	b.d.l.	0.000157192	0.00339915		b.d.l.	0.000543771	0.00191146	b.d.l.	b.d.l.	b.d.l.	b.d.l.	b.d.l.		0.0127917	0.00626113		b.d.l.	b.d.l.	b.d.l.	0.00286141	b.d.l.	b.d.l.		0.0174886	0.01052	0.0107074
La	b.d.l.	b.d.l.	b.d.l.	b.d.l.	b.d.l.	b.d.l.	b.d.l.	0.00191638	b.d.l.	b.d.l.	b.d.l.	b.d.l.	0.0010364	7.72848e-05		0.0486337	0.040838	0.05799	0.0415515	0.0406588	0.0230881	0.0239543	0.0167209	0.376326	0.000214193	0.00492352		0.0354144	0.0177343	0.0761153	0.00923607	0.0831456	0.0591256	b.d.l.	0.000670338		0.260679	0.218702		0.0422725	0.0504209	0.0631442	0.0264652	0.00353832	0.00122364		0.254234	0.121025	0.158416
Ce	b.d.l.	b.d.l.	0.00428728	b.d.l.	b.d.l.	b.d.l.	b.d.l.	0.00139739	b.d.l.	b.d.l.	b.d.l.	b.d.l.	0.00169892	5.7033e-05		0.0770544	0.0804779	0.0964698	0.0628644	0.0812772	0.0560831	0.0471604	0.0311357	1.04018	0.000329298	0.00415699		0.0950087	0.050379	0.165184	0.0126568	0.178548	0.11979	0.0110107	0.00529206		0.680687	0.586362		0.0467314	0.0461701	0.0564737	0.0771463	0.00759303	0.00594483		0.601254	0.302435	0.361201
Sn	0.618687	0.196372	0.356804	0.348558	0.322245	0.341001	0.250618	0.259935	0.112311	0.14056	0.275554	0.179492	0.0210651	0.0068172		0.610254	0.548771	0.618586	0.653918	0.414155	0.398927	0.583789	0.254368	0.478685	0.0201405	0.0661862		0.357424	0.326132	0.174449	0.164195	0.479057	0.450722	0.320412	0.30094		0.248654	0.336722		0.257194	0.171939	0.286572	0.0851647	0.0248772	0.312515		0.14666	0.149874	0.117914
Pb	0.0678077	b.d.l.	0.0325664	0.00954329	0.0202846	0.026567	0.0804965	0.0669529	0.00846077	0.0063417	b.d.l.	0.0148835	0.00838227	0.00181235		0.217389	0.351108	1.51796	0.593179	0.153363	0.151644	0.543613	0.107773	0.162479	0.000374718	0.0169039		0.00794634	0.00842291	0.0348749	0.0466533	0.0804809	0.0626643	0.0279499	0.0213874		0.0336214	0.0402563		0.182388	0.111388	0.13787	0.00665909	0.00524384	0.0187475		0.0243807	0.0162717	0.0348497
Sb	b.d.l.	b.d.l.	b.d.l.	b.d.l.	b.d.l.	b.d.l.	b.d.l.	b.d.l.	b.d.l.	b.d.l.	b.d.l.	0.0143052	0.00878995	0.00242158		b.d.l.	0.0577407	0.10607	b.d.l.	b.d.l.	b.d.l.	b.d.l.	b.d.l.	0.0393756	0.00857638	0.0275241		b.d.l.	b.d.l.	0.011504	b.d.l.	0.0762773	b.d.l.	b.d.l.	b.d.l.		b.d.l.	b.d.l.		b.d.l.	b.d.l.	b.d.l.	b.d.l.	b.d.l.	b.d.l.		b.d.l.	b.d.l.	b.d.l.
Sr	0.0255991	0.0061194	0.0940754	b.d.l.	0.0245326	0.0206907	0.064924	0.075116	0.0102344	0.013133	0.0128359	0.00668724	0.00227278	0.000690717		4.64331	5.7761	6.35881	3.86341	10.7969	4.25914	3.56792	2.71671	9.23865	0.00215824	0.0087711		0.220435	0.164329	1.06888	0.302408	0.558375	0.538424	0.0640444	0.0904594		1.48087	1.21569		1.27714	0.960501	1.8689	2.06245	0.239362	0.600763		15.5055	8.75739	4.29211
Zr	b.d.l.	b.d.l.	b.d.l.	b.d.l.	b.d.l.	b.d.l.	b.d.l.	0.0299931	b.d.l.	b.d.l.	b.d.l.	b.d.l.	0.00316561	0.00080602		0.0759679	b.d.l.	0.140946	0.0689952	0.0290416	b.d.l.	b.d.l.	0.0281407	0.236281	0.00289572	0.0956187		0.0476419	b.d.l.	0.281723	0.00688959	0.193086	0.133606	0.00690645	b.d.l.		1.12393	0.200157		0.0116092	0.0260553	0.0347319	0.339514	0.00502973	b.d.l.		1.70958	1.05798	1.23834
Hf	b.d.l.	b.d.l.	b.d.l.	b.d.l.	b.d.l.	b.d.l.	b.d.l.	b.d.l.	b.d.l.	b.d.l.	b.d.l.	b.d.l.	0.00560962	0.000155709		b.d.l.	b.d.l.	b.d.l.	b.d.l.	b.d.l.	b.d.l.	0.0137959	b.d.l.	0.0039497	0.000558867	0.011935		b.d.l.	b.d.l.	0.00797046	b.d.l.	b.d.l.	b.d.l.	b.d.l.	b.d.l.		0.0398585	b.d.l.		b.d.l.	b.d.l.	b.d.l.	0.00506481	b.d.l.	b.d.l.		0.0222915	0.0174809	0.0151593
Ti	2.84472	1.00047	0.532395	1.37644	1.08771	12.4906	13.6008	13.4287	1.01723	1.15737	9.23924	5.80657	0.374616	0.0652183		106.376	99.088	166.206	119.939	73.9781	102.074	90.2603	60.2299	127.002	0.400836	1.23538		27.6086	28.9413	7.02263	5.48881	41.9051	39.1862	18.2809	14.8591		124.008	63.7996		8.30197	15.4458	7.4009	11.5971	2.08994	12.3121		29.7047	23.12	24.1163
Dy	b.d.l.	b.d.l.	b.d.l.	b.d.l.	b.d.l.	b.d.l.	b.d.l.	b.d.l.	b.d.l.	b.d.l.	b.d.l.	b.d.l.	0.00481002	0.0001921		b.d.l.	b.d.l.	0.0532391	0.0129038	0.0195745	0.0242815	0.00280045	b.d.l.	0.0385022	0.000669412	0.0149615		b.d.l.	b.d.l.	0.0103975	b.d.l.	b.d.l.	0.0158805	b.d.l.	b.d.l.		0.0373231	0.0416634		b.d.l.	b.d.l.	b.d.l.	0.00427254	0.000206008	b.d.l.		0.0481467	0.0274819	0.0271696
Ga	b.d.l.	b.d.l.	b.d.l.	b.d.l.	b.d.l.	b.d.l.	b.d.l.	b.d.l.	b.d.l.	b.d.l.	b.d.l.	b.d.l.	0.0158227	0.00442808		0.547008	0.40439	1.3449	1.12201	0.311644	0.577887	0.978213	0.529854	0.772955	0.0110586	0.0394024		0.338673	0.360893	b.d.l.	0.474089	0.304931	0.338519	0.524137	0.34286		1.06157	0.693197		0.582559	0.533002	0.625959	0.357934	0.0317178	0.277298		0.338857	0.372648	0.308586
Y	b.d.l.	b.d.l.	b.d.l.	b.d.l.	b.d.l.	b.d.l.	b.d.l.	b.d.l.	b.d.l.	b.d.l.	b.d.l.	b.d.l.	0.0027083	9.31809e-05		0.123299	0.130046	0.250971	0.150833	0.126012	0.120982	0.156815	0.0779532	0.263858	0.000543937	0.00728192		0.0329565	0.0148882	0.0931653	0.0174828	0.080207	0.0506925	0.0101622	0.0117628		0.232571	0.209186		0.0408625	0.0382937	0.0422724	0.0340361	0.012509	0.0124011		0.260244	0.151458	0.140866
Yb	b.d.l.	b.d.l.	b.d.l.	b.d.l.	b.d.l.	b.d.l.	b.d.l.	b.d.l.	b.d.l.	b.d.l.	b.d.l.	b.d.l.	0.00880938	0.000207871		0.0414888	0.016083	b.d.l.	0.0325315	0.0226046	0.0519506	0.0331914	0.0180502	0.0336301	0.000745081	0.0184427		0.00562027	b.d.l.	0.0248992	0.0115109	b.d.l.	b.d.l.	b.d.l.	b.d.l.		0.014812	0.0126662		0.0118468	0.0103761	0.0268774	0.0044926	0.00337583	b.d.l.		0.0452812	0.0204084	0.0205225
Khara-Nur	Primary Olivine																											Primary Orthopyroxene
Sample No	S12-27_03	S12-27_04	S12-27-01	S12-28-01	S12-28_1-01	S12-28_1-01	S12-28/1_5	S12-28/1_6	S12-28/1_03	S18-131-01	S18-131-02	S18-131-03	S18-131-04	S18-131-05	S18-131-06	S18-131-07	S18-131-08	S18-128_03	S18-128_01	S18-125_04	S18-126_06	S18-126_07	S18-126_08	S18-127_02	LOD max	LOD min		S12-27_01Opx	S12-27_02Opx	S12-27-01c	S12-27-01r	S12-27-02	S12-27	S12-28-01	S12-28-02	S12-28-03	S12-28	S12-27_1-01	S12-27_1-02	S12-27/1	S12-28/1_01Opx	S12-28/1_02Opx	S12-28_1-01	S12-28_1-02	S12-28/1	S18-15_04Ol	S21-142-03Opx	S21-142-04Opx	S18-127_01Ol
Cs (ppm)	b.d.l.	b.d.l.	b.d.l.	b.d.l.	b.d.l.	b.d.l.	b.d.l.	b.d.l.	b.d.l.	b.d.l.	b.d.l.	b.d.l.	b.d.l.	b.d.l.	b.d.l.	b.d.l.	b.d.l.	b.d.l.	0.0281998	b.d.l.	b.d.l.	b.d.l.	b.d.l.	0.0231599	0.00980637	0.003466		b.d.l.	b.d.l.	0.00441622	b.d.l.	b.d.l.	0.00441622	0.00712854	b.d.l.	b.d.l.	0.00712854	b.d.l.	b.d.l.	b.d.l.	b.d.l.	b.d.l.	b.d.l.	0.00423645	0.00423645	0.0140486	b.d.l.	b.d.l.	b.d.l.
Rb	b.d.l.	b.d.l.	0.0408173	0.0180464	0.0176713	0.0493256	b.d.l.	b.d.l.	b.d.l.	b.d.l.	b.d.l.	b.d.l.	b.d.l.	b.d.l.	b.d.l.	b.d.l.	b.d.l.	b.d.l.	b.d.l.	b.d.l.	b.d.l.	b.d.l.	b.d.l.	b.d.l.	0.0180317	0.00849049		b.d.l.	b.d.l.	0.0470954	0.025978	0.0267387	0.0332707	0.104028	0.022951	0.0216261	0.049535	0.0385285	0.0569132	0.0477208	b.d.l.	b.d.l.	0.0104431	0.041674	0.0260586	0.0582212	b.d.l.	b.d.l.	b.d.l.
Ba	b.d.l.	b.d.l.	0.260171	b.d.l.	0.0924335	0.303406	b.d.l.	b.d.l.	b.d.l.	b.d.l.	b.d.l.	b.d.l.	b.d.l.	b.d.l.	b.d.l.	b.d.l.	b.d.l.	0.123706	b.d.l.	b.d.l.	b.d.l.	b.d.l.	b.d.l.	b.d.l.	0.0954801	0.00815535		b.d.l.	b.d.l.	0.158567	0.0868414	0.084504	0.109971	0.715336	0.0515593	0.0570652	0.274654	0.171963	0.095735	0.133849	b.d.l.	b.d.l.	0.0394397	0.165554	0.102497	0.160862	b.d.l.	b.d.l.	b.d.l.
Th	b.d.l.	b.d.l.	b.d.l.	b.d.l.	b.d.l.	b.d.l.	b.d.l.	b.d.l.	b.d.l.	b.d.l.	b.d.l.	b.d.l.	b.d.l.	b.d.l.	b.d.l.	b.d.l.	b.d.l.	b.d.l.	b.d.l.	b.d.l.	b.d.l.	b.d.l.	b.d.l.	b.d.l.	0.00956092	0.000913684		b.d.l.	b.d.l.	b.d.l.	b.d.l.	b.d.l.	b.d.l.	b.d.l.	b.d.l.	b.d.l.	b.d.l.	b.d.l.	b.d.l.	b.d.l.	b.d.l.	b.d.l.	b.d.l.	b.d.l.	b.d.l.	b.d.l.	b.d.l.	b.d.l.	b.d.l.
U	b.d.l.	b.d.l.	b.d.l.	b.d.l.	b.d.l.	b.d.l.	b.d.l.	b.d.l.	b.d.l.	b.d.l.	b.d.l.	b.d.l.	b.d.l.	b.d.l.	b.d.l.	b.d.l.	b.d.l.	b.d.l.	b.d.l.	b.d.l.	b.d.l.	b.d.l.	b.d.l.	b.d.l.	0.00731417	0.000869331		b.d.l.	b.d.l.	b.d.l.	b.d.l.	b.d.l.	b.d.l.	b.d.l.	b.d.l.	b.d.l.	b.d.l.	b.d.l.	b.d.l.	b.d.l.	b.d.l.	b.d.l.	b.d.l.	b.d.l.	b.d.l.	b.d.l.	b.d.l.	b.d.l.	b.d.l.
W	b.d.l.	b.d.l.	b.d.l.	b.d.l.	b.d.l.	b.d.l.	b.d.l.	b.d.l.	b.d.l.	b.d.l.	b.d.l.	b.d.l.	b.d.l.	b.d.l.	b.d.l.	b.d.l.	b.d.l.	b.d.l.	b.d.l.	b.d.l.	0.0732475	0.101437	0.150099	b.d.l.	0.00524589	0.00300174		b.d.l.	b.d.l.	b.d.l.	b.d.l.	b.d.l.	b.d.l.	b.d.l.	b.d.l.	b.d.l.	b.d.l.	b.d.l.	b.d.l.	b.d.l.	b.d.l.	b.d.l.	b.d.l.	b.d.l.	b.d.l.	b.d.l.	b.d.l.	b.d.l.	b.d.l.
Nb	b.d.l.	b.d.l.	b.d.l.	b.d.l.	b.d.l.	b.d.l.	b.d.l.	b.d.l.	b.d.l.	b.d.l.	b.d.l.	b.d.l.	b.d.l.	b.d.l.	b.d.l.	b.d.l.	b.d.l.	b.d.l.	b.d.l.	b.d.l.	b.d.l.	b.d.l.	b.d.l.	b.d.l.	0.0231263	0.00171757		b.d.l.	b.d.l.	b.d.l.	0.00114918	0.00408463	0.0026169	0.00296722	b.d.l.	b.d.l.	0.00296722	b.d.l.	0.00160109	0.00160109	b.d.l.	b.d.l.	0.0010002	b.d.l.	0.0010002	b.d.l.	b.d.l.	b.d.l.	b.d.l.
Ta	b.d.l.	b.d.l.	b.d.l.	b.d.l.	b.d.l.	b.d.l.	b.d.l.	b.d.l.	b.d.l.	b.d.l.	b.d.l.	b.d.l.	b.d.l.	b.d.l.	b.d.l.	b.d.l.	b.d.l.	b.d.l.	b.d.l.	b.d.l.	b.d.l.	b.d.l.	b.d.l.	b.d.l.	0.00141808	0.000365063		b.d.l.	b.d.l.	b.d.l.	b.d.l.	b.d.l.	b.d.l.	b.d.l.	b.d.l.	b.d.l.	b.d.l.	b.d.l.	b.d.l.	b.d.l.	b.d.l.	b.d.l.	b.d.l.	b.d.l.	b.d.l.	b.d.l.	b.d.l.	b.d.l.	b.d.l.
La	b.d.l.	b.d.l.	b.d.l.	b.d.l.	b.d.l.	b.d.l.	b.d.l.	b.d.l.	b.d.l.	b.d.l.	b.d.l.	b.d.l.	b.d.l.	b.d.l.	b.d.l.	b.d.l.	b.d.l.	b.d.l.	b.d.l.	b.d.l.	0.0446634	0.0386404	0.0558851	b.d.l.	0.00714569	0.0010381		b.d.l.	b.d.l.	0.00179941	0.00143734	0.00280251	0.00201309	0.00749012	0.0016143	0.00142467	0.0035097	0.00497832	0.00250976	0.00374404	b.d.l.	b.d.l.	0.0011039	0.00228724	0.00169557	b.d.l.	b.d.l.	b.d.l.	b.d.l.
Ce	b.d.l.	b.d.l.	0.00868239	b.d.l.	0.00368971	0.00415322	b.d.l.	b.d.l.	b.d.l.	b.d.l.	b.d.l.	b.d.l.	b.d.l.	b.d.l.	b.d.l.	b.d.l.	b.d.l.	b.d.l.	b.d.l.	b.d.l.	0.0313581	0.0317953	0.0516029	b.d.l.	0.00585214	0.00108081		b.d.l.	b.d.l.	0.00418673	0.00318592	0.00404506	0.00380591	0.0161029	0.00203857	0.00163942	0.00659364	0.00992427	0.00425268	0.00708847	b.d.l.	b.d.l.	0.00487913	0.00399005	0.00443459	b.d.l.	b.d.l.	0.070455	b.d.l.
Sn	0.3252	0.338081	b.d.l.	b.d.l.	b.d.l.	b.d.l.	b.d.l.	b.d.l.	0.222864	b.d.l.	b.d.l.	b.d.l.	b.d.l.	b.d.l.	b.d.l.	b.d.l.	b.d.l.	0.286124	0.20506	0.221787	0.31722	0.344756	0.324646	0.244989	0.0604427	0.0195878		0.335838	0.334714	0.00285698	0.00435389	0.00452668	0.00391252	b.d.l.	b.d.l.	0.00150268	0.00150268	0.00642382	0.00403742	0.00523062	0.334181	0.250389	0.00474388	0.00504223	0.00489305	0.167007	0.178057	0.167494	0.258075
Pb	b.d.l.	b.d.l.	0.504806	0.415098	0.392088	0.437743	b.d.l.	b.d.l.	b.d.l.	b.d.l.	b.d.l.	b.d.l.	b.d.l.	b.d.l.	b.d.l.	b.d.l.	b.d.l.	0.107238	b.d.l.	b.d.l.	0.0833347	0.0933021	0.193948	0.0670522	0.0244384	0.00301996		b.d.l.	b.d.l.	0.358834	0.509734	0.685556	0.518041	0.522426	0.36991	0.160836	0.351058	0.469241	0.377949	0.423595	0.025145	b.d.l.	0.426403	1.14799	0.787195	b.d.l.	b.d.l.	b.d.l.	b.d.l.
Sb	b.d.l.	b.d.l.	b.d.l.	b.d.l.	b.d.l.	b.d.l.	b.d.l.	b.d.l.	b.d.l.	b.d.l.	b.d.l.	b.d.l.	b.d.l.	b.d.l.	b.d.l.	b.d.l.	b.d.l.	b.d.l.	b.d.l.	0.0211763	0.113719	0.0826764	0.0512384	0.033942	0.0262201	0.00601028		b.d.l.	0.0794406	b.d.l.	b.d.l.	b.d.l.	b.d.l.	b.d.l.	b.d.l.	b.d.l.	b.d.l.	b.d.l.	b.d.l.	b.d.l.	b.d.l.	b.d.l.	b.d.l.	b.d.l.	b.d.l.	b.d.l.	b.d.l.	b.d.l.	b.d.l.
Sr	0.0375414	0.0234251	0.106865	0.0206986	0.0308676	0.0782844	0.282437	0.0343709	0.0187763	0.0359963	0.083643	0.0728358	0.0695971	0.0935311	0.0938387	0.0680468	0.0737274	0.135291	b.d.l.	0.0129081	b.d.l.	b.d.l.	b.d.l.	b.d.l.	0.0154169	0.00236702		b.d.l.	b.d.l.	0.053603	0.0443736	0.0401629	0.0460465	0.0463391	0.0276092	0.028404	0.0341174	0.0916584	0.153802	0.12273	0.0454568	b.d.l.	0.0606261	0.0741126	0.0673694	0.141479	0.0127281	0.00737972	0.00878882
Zr	0	0	0.0881409	0.0392181	0.0315296	0.0417209	b.d.l.	b.d.l.	0	0.00969317	0.0192667	0.0130091	0.0144257	0.0239471	0.0249319	0.0121685	0.00936946	0.00987699	0.0167488	0.00701655	b.d.l.	b.d.l.	b.d.l.	0.0100914	0.0260617	0.00212473		b.d.l.	b.d.l.	0.0595808	0.0559936	0.0629945	0.059523	0.0436308	0.0125877	0.031169	0.0291291	0.0542953	0.0845205	0.0694079	b.d.l.	b.d.l.	0.0309226	0.0519817	0.0414522	b.d.l.	b.d.l.	b.d.l.	b.d.l.
Hf	b.d.l.	b.d.l.	b.d.l.	b.d.l.	b.d.l.	b.d.l.	b.d.l.	b.d.l.	b.d.l.	b.d.l.	b.d.l.	b.d.l.	b.d.l.	b.d.l.	b.d.l.	b.d.l.	b.d.l.	b.d.l.	b.d.l.	b.d.l.	b.d.l.	b.d.l.	b.d.l.	b.d.l.	0.00582105	0.00131448		b.d.l.	b.d.l.	b.d.l.	0.00289037	b.d.l.	0.00289037	0.00140255	b.d.l.	b.d.l.	0.00140255	b.d.l.	0.00328191	0.00328191	b.d.l.	b.d.l.	0.0012814	0.0017419	0.00151165	b.d.l.	b.d.l.	b.d.l.	b.d.l.
Ti	b.d.l.	b.d.l.	1.54747	b.d.l.	1.89288	1.99795	1.96924	b.d.l.	1.25423	0.468843	0.510275	0.482724	0.442735	0.886545	0.781902	0.541277	0.771057	1.29162	b.d.l.	b.d.l.	b.d.l.	b.d.l.	b.d.l.	b.d.l.	1.98418	0.393641		43.0333	40.4606	40.7794	39.1093	37.9977	39.2955	19.4917	18.6911	19.1166	19.0998	39.1907	38.4179	38.8043	93.0557	95.0853	71.1304	75.1123	73.1214	35.2029	1.71582	2.00849	35.9535
Dy	b.d.l.	b.d.l.	b.d.l.	b.d.l.	b.d.l.	b.d.l.	b.d.l.	b.d.l.	b.d.l.	b.d.l.	b.d.l.	b.d.l.	b.d.l.	b.d.l.	b.d.l.	b.d.l.	b.d.l.	b.d.l.	b.d.l.	b.d.l.	b.d.l.	b.d.l.	b.d.l.	b.d.l.	0.00575251	0.00328776		b.d.l.	b.d.l.	b.d.l.	b.d.l.	b.d.l.	b.d.l.	b.d.l.	b.d.l.	b.d.l.	b.d.l.	b.d.l.	b.d.l.	b.d.l.	b.d.l.	b.d.l.	b.d.l.	b.d.l.	b.d.l.	b.d.l.	b.d.l.	b.d.l.	b.d.l.
Ga	b.d.l.	b.d.l.	b.d.l.	b.d.l.	b.d.l.	b.d.l.	0.0842408	b.d.l.	b.d.l.	b.d.l.	b.d.l.	b.d.l.	b.d.l.	b.d.l.	b.d.l.	0.0195415	0.0169878	0.0886037	0.204198	b.d.l.	b.d.l.	0.0472276	b.d.l.	0.26366	0.0427555	0.0154914		b.d.l.	b.d.l.	b.d.l.	b.d.l.	b.d.l.	b.d.l.	b.d.l.	b.d.l.	b.d.l.	b.d.l.	b.d.l.	b.d.l.	b.d.l.	b.d.l.	b.d.l.	b.d.l.	b.d.l.	b.d.l.	b.d.l.	b.d.l.	b.d.l.	0.923713
Y	b.d.l.	b.d.l.	b.d.l.	b.d.l.	0.000912411	b.d.l.	b.d.l.	b.d.l.	b.d.l.	b.d.l.	b.d.l.	b.d.l.	b.d.l.	b.d.l.	b.d.l.	b.d.l.	b.d.l.	b.d.l.	0.0265118	b.d.l.	0.142101	0.143334	0.183165	b.d.l.	0.0158082	0.000846706		0.0298652	0.0408389	0.0438036	0.0469992	0.0411487	0.0439838	0.0254761	0.0244673	0.0251049	0.0250161	0.0563476	0.0513289	0.0538382	0.0336602	0.0286359	0.0666672	0.0633598	0.0650135	0.0134974	b.d.l.	b.d.l.	b.d.l.
Yb	b.d.l.	b.d.l.	b.d.l.	b.d.l.	b.d.l.	b.d.l.	b.d.l.	b.d.l.	b.d.l.	b.d.l.	b.d.l.	b.d.l.	b.d.l.	b.d.l.	b.d.l.	b.d.l.	b.d.l.	b.d.l.	b.d.l.	b.d.l.	b.d.l.	b.d.l.	b.d.l.	b.d.l.	0.0184742	0.00344413		b.d.l.	b.d.l.	0.0222972	0.0218038	0.0251156	0.0230722	0.0251476	0.0247893	0.0237473	0.0245614	0.0263246	0.0258674	0.026096	b.d.l.	b.d.l.	0.0291255	0.0279974	0.0285615	0.00781979	b.d.l.	b.d.l.	b.d.l.
[truncated: 38 more columns]

## Sheet: Opx
Alag-Khadny
Sample No	M16-45							M16-48
Point No	M1645-8	M1645-9	M1645-16	M1645-17	M1645-40	M1645-41	M1645-42	M1648-41
SiO2	56.76	57.021	55.503	56.209	55.766	57.259	57.454	57.445
TiO2	0	0.003	0.028	0.024	0	0	0.007	0
Al2O3	2.293	2.211	2.31	2.375	2.566	2.47	2.48	1.705
Cr2O3	0.563	0.565	0.529	0.555	0.591	0.53	0.48	0.328
FeO	5.527	5.591	5.669	5.681	5.742	5.479	5.769	5.754
MnO	0.122	0.149	0.095	0.147	0.12	0.126	0.163	0.141
MgO	33.505	33.701	33.266	33.562	33.537	33.893	33.732	33.729
CaO	0.436	0.333	0.308	0.38	0.391	0.345	0.304	0.516
Na2O	0.003	0.001	0	0.005	0	0	0.017	0
K2O	0.012	0	0	0	0	0	0	0
NiO	0.066	0.05	0.128	0.096	0.091	0.061	0.105	0.031
V2O3	0.029	0.022	0.04	0.12	0.019	0.024	0.026	0.099
ZnO	0.003	0.015	0.005	0	0	0.005	0	0.013
Total	99.319	99.662	97.882	99.046	98.823	100.192	100.537	99.761
Si	1.96409	1.96595	1.95315	1.9536	1.94433	1.96206	1.96464	1.98017
Al (IV)	0.0359133	0.034054	0.046853	0.0464033	0.0556736	0.0379439	0.0353604	0.0198258
Al (VI)	0.0575954	0.0557831	0.0489459	0.0508765	0.0497618	0.061802	0.0645808	0.0494378
Fe(3+)	0	0	0	0	0	0	0	0
Cr	0.0154018	0.0154003	0.014717	0.0152499	0.0162904	0.0143578	0.0129762	0.00893861
Ti	0	7.77947e-05	0.000741086	0.000627382	0	0	0.000180033	0
Fe(2+)	0.159923	0.161187	0.166812	0.165104	0.167404	0.15699	0.164955	0.165853
Mn	0.00357534	0.00435073	0.00283127	0.00432698	0.0035434	0.0036566	0.00472051	0.00411632
Mg	1.72843	1.73223	1.74519	1.73901	1.74321	1.73142	1.71961	1.73332
Ca	0.0161632	0.0122999	0.0116116	0.0141493	0.0146049	0.0126651	0.0111367	0.0190556
Na	0.000201256	6.68413e-05	0	0.000336905	0	0	0.00112699	0
K	0.000529674	0	0	0	0	0	0	0
TOTAL	3.98182	3.98139	3.99085	3.98968	3.99481	3.98089	3.97929	3.98072
Mg#	0.915311	0.91487	0.912755	0.913291	0.912382	0.916867	0.91247	0.912671
Khara-Nur (Ol-Opx-Tr rocks)
Sample No	S12-91											S21-92										S21-88							S18-127
Point No	S21-91_1	S21-91_2	S21-91_3	S21-91_12	S21-91_13	S21-91_18	S21-91_29	S21-91_38	S21-91_39	S21-91_40	S21-91_41	S21-92_9	S21-92_20	S21-92_29	S21-92_30	S21-92_31	S21-92_32	S21-92_33	S21-92_34	S21-92_35	S21-92_36	S21-88_1	S21-88_2	S21-88_3	S21-88_4	S21-88_8	S21-88_11	S21-88_22	S18-127-10	S18-127-11
SiO2	56.789	56.775	56.251	57.197	57.47	57.43	56.437	56.823	56.481	57.085	56.542	56.841	56.626	56.093	56.891	56.229	56.124	56.793	56.419	56.785	56.469	56.858	56.078	56.702	57.017	56.456	56.729	56.662	56.84	56.416
TiO2	0.002	0	0.009	0.018	0.011	0.016	0.005	0.006	0.002	0.016	0	0.022	0.013	0.031	0.039	0	0.033	0.019	0	0.012	0.029	0	0.008	0.012	0.01	0.02	0	0	0.026	0
Al2O3	1.631	1.667	1.934	1.054	1.039	1.238	1.752	1.72	1.699	1.662	1.674	0.678	1.54	2.046	2.026	1.909	1.884	1.747	1.912	1.063	0.997	1.693	1.708	1.607	1.507	1.114	1.113	1.437	1.978	2.096
Cr2O3	0.799	0.788	0.901	0.275	0.329	0.507	0.642	0.796	0.842	0.706	0.691	0.149	0.598	0.881	0.934	0.799	0.653	0.609	0.547	0.227	0.233	0.94	0.959	0.721	0.709	0.399	0.317	0.543	0.822	0.866
FeO	5.025	5.307	5.412	5.209	5.266	5.269	5.222	5.287	5.22	5.123	5.306	5.269	5.041	4.879	4.898	4.928	4.907	4.997	5.183	5.119	5.344	4.977	5.051	5.222	5.144	5.27	5.381	5.136	4.888	4.933
MnO	0.124	0.091	0.111	0.12	0.108	0.114	0.13	0.123	0.119	0.116	0.109	0.128	0.141	0.132	0.135	0.116	0.122	0.129	0.139	0.126	0.123	0.122	0.134	0.113	0.106	0.143	0.117	0.119	0.121	0.12
MgO	34.286	35.268	35.275	36.041	35.773	36.222	34.918	35.063	35.269	35.179	36.005	36.463	35.924	35.222	35.797	35.825	36.032	36.573	36.48	36.325	36.484	35.308	35.161	35.476	35.92	36.151	35.944	35.146	33.652	33.443
CaO	1.863	0.428	0.545	0.339	0.461	0.366	0.993	1.052	1.266	1.728	1.107	0.368	0.915	1.091	0.91	1.293	1.092	0.352	0.332	0.351	0.363	1.477	1.601	0.522	0.582	0.588	0.586	0.967	1.392	1.211
Na2O	0	0	0	0	0	0.013	0	0	0	0	0.064	0	0.005	0.029	0	0.085	0	0	0.032	0	0	0	0.003	0	0	0.035	0.043	0	0	0.012
K2O	0.012	0	0	0	0.002	0.003	0	0.005	0.002	0.002	0.003	0.015	0.004	0	0.001	0.008	0	0.014	0	0.018	0.002	0	0.002	0.003	0	0.006	0	0.004	0.005	0
NiO	0.067	0.102	0.07	0.082	0.077	0.108	0.046	0.12	0.094	0.094	0.088	0.076	0.073	0.073	0.097	0.096	0.052	0.041	0.066	0.042	0.092	0.155	0.104	0.093	0.091	0.058	0.064	0.099	0.11	0.111
ZnO	0.04	0	0	0	0	0	0	0.021	0.004	0.008	0.018	0	0	0.03	0	0	0.006	0	0	0.031	0	0	0	0	0	0.014	0.034	0.007	99.885	99.208
Total	100.638	100.426	100.508	100.335	100.536	101.286	100.145	101.016	100.998	101.719	101.607	100.009	100.88	100.507	101.728	101.288	100.905	101.274	101.11	100.099	100.136	101.53	100.809	100.471	101.086	100.254	100.328	100.12
Si	1.94899	1.94676	1.93102	1.95923	1.96475	1.95153	1.94243	1.94206	1.93245	1.93894	1.92411	1.956	1.93511	1.92547	1.92762	1.91826	1.91881	1.9294	1.92239	1.95078	1.94304	1.93495	1.92489	1.94376	1.94245	1.94151	1.94883	1.95007	1.95951	1.95711
Al (IV)	0	0	0	0.000463743	0.000282847	0.00040893	0	0	0	0.000408747	0	0.000569407	0.000334138	0.000800355	0.000993882	0	0.000848574	0.000485482	0	0.000310061	0.000750519	0	0.00025817	0.000309398	0.000256235	0.000517309	0	0	0.000674152	0
Al (VI)	0.0659675	0.067363	0.0782425	0.0425484	0.0418612	0.0495779	0.0710632	0.0692781	0.0685063	0.0665278	0.0671341	0.0274959	0.0620214	0.0827684	0.0808998	0.0767507	0.0759093	0.069944	0.0767776	0.0430365	0.0404294	0.0678992	0.0690926	0.0649218	0.0605047	0.0451485	0.0450603	0.0582834	0.0803617	0.0856908
Fe(3+)	0.0216789	0.0213613	0.0244527	0.00744715	0.00889216	0.0136204	0.0174687	0.0215078	0.0227753	0.018958	0.0185901	0.00405358	0.0161561	0.0239084	0.025019	0.0215495	0.0176499	0.0163565	0.0147349	0.00616516	0.0063383	0.0252901	0.0260242	0.01954	0.0190958	0.0108479	0.0086094	0.0147742	0.0224032	0.0237506
Cr	0.144207	0.152163	0.155352	0.1492	0.150539	0.149716	0.150287	0.151095	0.149342	0.145502	0.150983	0.151614	0.144049	0.140043	0.138771	0.140579	0.140282	0.141951	0.147673	0.147049	0.153759	0.141628	0.144975	0.149687	0.146538	0.151545	0.154574	0.147804	0.140905	0.143096
Ti	0.00360418	0.00264263	0.00322714	0.00348123	0.00312701	0.00328081	0.00378933	0.00356026	0.0034482	0.00333687	0.0031414	0.00373041	0.00408083	0.00383744	0.00387392	0.00335153	0.0035325	0.00371155	0.00401116	0.00366592	0.00358439	0.00351622	0.00389544	0.00328066	0.00305837	0.00416489	0.00340403	0.00346852	0.00353278	0.0035256
Fe(2+)	1.75423	1.80286	1.8053	1.84049	1.82325	1.83499	1.79166	1.78653	1.79897	1.78136	1.82661	1.87062	1.83021	1.80247	1.80821	1.82204	1.83653	1.85231	1.85309	1.86039	1.87154	1.79133	1.79928	1.81303	1.82435	1.85342	1.84086	1.80326	1.72953	1.72959
Mn	0.0684985	0.0157225	0.0200436	0.0124404	0.0168845	0.0133242	0.0366144	0.038519	0.0464048	0.0628793	0.0403578	0.0135668	0.0334991	0.0401214	0.0330325	0.0472571	0.0399971	0.0128113	0.0121193	0.0129182	0.0133814	0.0538493	0.0588744	0.0191707	0.0212418	0.0216635	0.0215669	0.0356538	0.0514107	0.0450069
Mg	0	0	0	0	0	0	0	0	0	0	0.00422227	0	0	0.0019299	0	0.00562178	0	0	0.00211385	0	0	0	0	0	0	0.00233348	0.00286382	0	0	0.000807053
Ca	0	0	0	0	0	0	0	0	0	0	0	0	0	0	0	0	0	0	0	0	0	0	0	0	0	0	0	0.000175601	0.000219873	0
Na	4.00718	4.00887	4.01763	4.01531	4.00959	4.01646	4.01331	4.01255	4.0219	4.01791	4.03514	4.02765	4.02546	4.02135	4.01843	4.0354	4.03356	4.02697	4.03291	4.02431	4.03282	4.01846	4.02729	4.0137	4.01749	4.03115	4.02577	4.01349	3.98855	3.98857
K
Mg#	0.924039	0.922168	0.920765	0.925013	0.923731	0.924565	0.92261	0.922021	0.923348	0.924487	0.923653	0.925026	0.927036	0.927906	0.928725	0.928372	0.929036	0.92882	0.926192	0.926748	0.924081	0.92673	0.925434	0.923735	0.925649	0.924415	0.922536	0.924244	0.924667	0.923588

## Sheet: Ol
Alag-Khadny
Type	Prymary olivine																																Secondary olivine
Sample No	M16-29			M16-12			M16-20				M16-48		M16-45					M16-11															M16-29				M16-11		M16-48
Point No	M1629-35	M1629-16	M1629-17	M1612-6	M1612-7	M1612-5	M1620-3	M1620-4	M1620-10	M1620-11	M1648-36	M1648-37	M1645-61	M1645-39	M1645-60	M1645-29	M1645-1	M1611-2	M1611-31	M1611-34	M1611-20	M1611-5	M1611-16	M1611-27	M1611-11	M1611-69	M1611-12	M1611-26	M1611-24	M1611-70	M1611-17	M1611-18	M1629-42	M1629-41	M1629-15	M1629-14	M1611-64	M1611-63	M1648-44	M1648-43
SiO2	41.841	41.72	40.859	41.043	40.793	41.158	40.299	40.619	40.492	40.365	40.939	40.631	40.527	41.094	41.254	40.956	40.861	42.259	40.743	42.109	41.621	39.902	42.199	42.227	41.569	41.381	43.062	42.686	41.537	41.436	41.765	42.586	39.962	39.843	40.093	40.528	40.112	39.782	35.2798	37.879
TiO2	0	0	0	0	0.009	0	0	0.011	0	0.012	0	0	0	0.012	0.015	0	0.005	0	0	0	0	0.001	0.021	0.003	0	0.001	0.003	0	0	0.006	0	0.007	0.023	0	0.003	0	0.011	0	0.021	0
Al2O3	0.013	0.005	0.001	0.01	0.011	0.013	0.033	0.021	0.009	0	0.009	0	0	0.018	0.016	0.009	0.004	0.048	0.008	0	0.007	0.002	0.021	0	0	0	0	0	0	0.038	0.021	0	0.013	0.009	0.025	0.003	0	0	0	0
Cr2O3	0.026	0.003	0.026	0.061	0.028	0.003	0	0	0.038	0.03	0	0	0	0	0.015	0	0	0.013	0	0.038	0.018	0.041	0.015	0.028	0	0	0	0.005	0	0.013	0	0.046	0.058	0.07	0.068	0.038	0	0	0.0946151	0.0141833
FeO	7.893	8.066	8.159	8.715	8.394	8.518	8.777	8.966	8.334	8.58	7.765	7.762	8.45	8.572	8.593	8.727	8.452	9.224	8.696	8.889	8.952	9.002	8.947	9.118	9.13	9.11	9.185	9.143	9.325	9.287	9.288	9.589	12.092	12.558	12.69	13.679	11.553	14.597	13.5609	14.0865
MnO	0.11	0.108	0.099	0.096	0.124	0.124	0.113	0.126	0.113	0.111	0.101	0.088	0.111	0.071	0.104	0.113	0.081	0.096	0.125	0.071	0.13	0.073	0.109	0.132	0.12	0.125	0.104	0.087	0.134	0.134	0.095	0.109	0.344	0.368	0.427	0.464	0.404	0.643	0.416335	0.731212
MgO	49.646	50.054	49.334	49.02	48.893	49.1	48.932	48.375	48.885	48.983	49.051	49.119	49.885	49.139	49.233	49.288	48.988	49.704	48.544	49.144	49.217	49.193	48.876	49.326	49.071	48.914	49.241	48.829	49.407	49.191	48.789	49.405	46.563	45.897	45.467	44.977	47.055	43.983	47.1573	48.3455
CaO	0.003	0.015	0.001	0	0.014	0.003	0.016	0.013	0.021	0.003	0.032	0.057	0	0	0.047	0.009	0.009	0.004	0.179	0.072	0.131	0.019	0.307	0.015	0.028	0.002	0.02	0.025	0.022	0	0.014	0.017	0.008	0.03	0	0	0.084	0.093
NiO	0.439	0.439	0.38	0.412	0.36	0.34	0.427	0.371	0.402	0.378	0.431	0.39	0.442	0.418	0.393	0.376	0.361	0.389	0.339	0.307	0.365	0.385	0.33	0.424	0.396	0.354	0.418	0.38	0.384	0.391	0.385	0.391	0.45	0.326	0.484	0.408	0.373	0.265	0.236849	0.237759
ZnO	0.031	0.028	0	0.02	0.023	0.032	0.003	0	0.019	0	0	0.055	0	0.022	0	0.037	0.027	0	0	0.007	0	0	0.024	0.003	0	0.005	0.041	0.008	0.029	0.012	0.001	0.016	0	0	0.027	0.057	0	0	0	0.064
Total	100.03	100.479	98.876	99.391	98.681	99.323	98.613	98.518	98.321	98.463	98.328	98.103	99.422	99.364	99.687	99.517	98.827	101.737	98.634	100.637	100.441	98.618	100.849	101.276	100.314	99.892	102.074	101.163	100.838	100.508	100.358	102.166	99.518	99.139	99.336	100.176	99.592	99.363	96.7667	101.358
Si	1.01557	1.00969	1.00569	1.00746	1.00741	1.00973	0.998732	1.00713	1.00393	1.00047	1.01097	1.00678	0.994901	1.00807	1.00857	1.00436	1.00764	1.01323	1.00779	1.01869	1.01096	0.990648	1.01981	1.01678	1.01154	1.01117	1.02734	1.02719	1.00711	1.00761	1.01572	1.01799	0.997551	1.00035	1.00572	1.01119	0.997912	1.00588	0.923018	0.944386
Ti	0	0	0	0	0.000167169	0	0	0.000205135	0	0.000223703	0	0	0	0.000221405	0.000275818	0	9.2738e-05	0	0	0	0	1.86731e-05	0.000381704	5.43311e-05	0	1.83787e-05	5.38311e-05	0	0	0.000109738	0	0.000125853	0.000431825	0	5.66004e-05	0	0.000205827	0	0.000413233	0
Al	0.000371861	0.000142607	2.90072e-05	0.000289281	0.000320143	0.000375857	0.000963826	0.000613626	0.00026297	0	0.000261922	0	0	0.000520375	0.000460988	0.000260103	0.000116248	0.00135631	0.000233205	0	0.000200378	5.85174e-05	0.000598087	0	0	0	0	0	0	0.001089	0.000601882	0	0.000382438	0.000266301	0.000739055	8.82121e-05	0	0	0	0
Cr	0.000498913	5.73995e-05	0.000505934	0.00118376	0.000546669	5.81856e-05	0	0	0.000744839	0.000587848	0	0	0	0	0.000289918	0	0	0.00024642	0	0.000726771	0.000345652	0.000804736	0.000286584	0.000533013	0	0	0	9.51218e-05	0	0.000249921	0	0.000869317	0.00114462	0.00138945	0.00134853	0.000749558	0	0	0.00195699	0.00027956
Fe(ii)	0.160196	0.163231	0.167925	0.178879	0.173338	0.174739	0.181888	0.18589	0.172779	0.177824	0.160341	0.160825	0.173458	0.175833	0.175666	0.178954	0.174284	0.184931	0.179862	0.179815	0.181821	0.186882	0.180799	0.183585	0.185776	0.186142	0.183232	0.183974	0.189058	0.18884	0.188881	0.191669	0.2524	0.263648	0.266178	0.285387	0.240334	0.308621	0.296671	0.293668
Mn	0.0022612	0.00221363	0.00206371	0.00199572	0.00259348	0.00257638	0.00237177	0.00264584	0.00237275	0.00233003	0.00211232	0.00184671	0.00230779	0.00147507	0.00215333	0.00234687	0.00169169	0.00194938	0.00261858	0.00145468	0.00267426	0.00153492	0.0022309	0.00269183	0.00247306	0.00258685	0.00210132	0.00177306	0.00275161	0.00275968	0.0019567	0.00220669	0.00727252	0.00782506	0.00907138	0.00980469	0.00851213	0.0137692	0.00922498	0.0154395
Mg	1.79645	1.80595	1.81028	1.79386	1.80009	1.79579	1.80789	1.78814	1.8069	1.80996	1.80581	1.81448	1.8257	1.79707	1.79441	1.80193	1.80099	1.77666	1.7901	1.77241	1.78222	1.82076	1.7609	1.77066	1.78018	1.78189	1.75135	1.75173	1.7859	1.7833	1.76892	1.76064	1.73282	1.71795	1.70031	1.67299	1.74521	1.65794	1.83932	1.79693
Ca	7.80099e-05	0.000388915	2.63692e-05	0	0.000370401	7.88484e-05	0.000424812	0.000345319	0.000557796	7.96604e-05	0.000846587	0.00151312	0	0	0.001231	0.000236449	0.000237772	0.000102747	0.00474342	0.00186605	0.00340891	0.000505359	0.00794833	0.000386944	0.000729953	5.23569e-05	0.000511178	0.000644506	0.000571463	0	0.000364764	0.000435358	0.000213944	0.000806945	0	0	0.00223882	0.00251921	0	0
Ni	0.00857114	0.00854621	0.00752361	0.00813494	0.00715141	0.00670959	0.00851236	0.00739939	0.00801729	0.0075363	0.00856139	0.00777338	0.00872821	0.00824818	0.00772858	0.00741699	0.00716095	0.00750247	0.00674504	0.00597413	0.00713152	0.0076887	0.006415	0.00821237	0.00775135	0.00695814	0.00802165	0.00735556	0.00748932	0.0076482	0.00753165	0.0075183	0.00903583	0.00658394	0.00976606	0.0081885	0.00746439	0.0053898	0.00498452	0.00476822
TOTAL	2.984	2.99021	2.99404	2.9918	2.99199	2.99006	3.00079	2.99236	2.99557	2.99901	2.9889	2.99322	3.0051	2.99144	2.99078	2.99551	2.99221	2.98597	2.99209	2.98094	2.98877	3.0089	2.97937	2.9829	2.98846	2.98881	2.97261	2.97276	2.99289	2.99161	2.98398	2.98145	3.00125	2.99882	2.99318	2.98839	3.00188	2.99412	3.07559	3.05547
Fo	0.918127	0.917107	0.915113	0.909324	0.912164	0.911324	0.908589	0.905832	0.912724	0.910542	0.918449	0.918582	0.913234	0.910876	0.910833	0.90966	0.911767	0.905724	0.908698	0.907892	0.907425	0.906915	0.906886	0.906058	0.905504	0.905417	0.905286	0.904958	0.904272	0.904246	0.903524	0.901825	0.872861	0.866952	0.864643	0.854273	0.878958	0.843066	0.861109	0.859529
Fa	0.0818727	0.082893	0.0848874	0.0906757	0.0878362	0.0886762	0.0914111	0.0941681	0.0872761	0.0894582	0.0815506	0.081418	0.0867655	0.0891238	0.0891673	0.0903402	0.0882332	0.0942762	0.0913023	0.0921075	0.092575	0.0930852	0.0931136	0.0939416	0.0944962	0.0945828	0.0947144	0.0950424	0.0957277	0.0957535	0.0964758	0.0981754	0.127139	0.133048	0.135357	0.145727	0.121042	0.156934	0.138891	0.140471
Khara-Nur
Group	Ol-Opx-Tr rocks (primary olivine)																	Ol-Atg-Di rocks (primary olivine)						Ol-Opx-Tr rocks (secondary olivine)													Ol-Atg-Di rocks (secondary olivine)
Sample No	S18-128							S18-15						S18-127				S18-121						S18-128							S18-15				S18-127		S18-121
Point No	S18-128-1	S18-128-2	S18-128-4	S18-128-5	S18-128-6	S18-128-23	S18-128-24	S18-15-8	S18-15-9	S18-15-21	S18-15-22	S18-15-23	S18-15-24	S18-127-1	S18-127-2	S18-127-4	S18-127-5	S18-121-6	S18-121-7	S18-121-8	S18-121-9	S18-121-32	S18-121-33	S18-128-8	S18-128-9	S18-128-10	S18-128-38	S18-128-39	S18-128-3	S18-128-52	S18-15-5	S18-15-6	S18-15-5	S18-15-6	S18-127-19	S18-127-20	S18-121-14	S18-121-15	S18-121-20	S18-121-1	S18-121-2	S18-121-3
SiO2	41.401	41.544	41.455	41.138	41.523	41.235	41.499	41.421	41.554	40.772	40.91	40.57	40.535	39.709	40.276	39.712	39.694	40.693	39.7	40.058	40.308	41.296	41.216	39.698	39.756	40.283	40.46	40.388	41.567	39.774	40.792	41.095	40.792	41.095	39.316	39.424	40.236	40.518	39.794	38.835	39.116	40.147
TiO2	0	0.013	0.033	0	0	0	0	0	0.143	0	0.033	0.013	0	0	0	0.013	0.007	0.02	0	0	0	0.046	0.065	0.077	0	0	0.032	0.013	0	0	0.039	0	0.039	0	0	0.052	0	0	0	0	0.026	0.065
Al2O3	0	0.019	0.016	0	0	0	0	0	0.001	0.05	0.012	0.007	0	0.025	0	0	0.004	0	0.026	0	0	0	0	0.434	0.565	0.368	0.405	0.737	0.022	0.025	0	0.019	0	0.019	0.164	0.117	0.274	0.091	0.019	0.022	0	0.141
Cr2O3	0.009	0.037	0.014	0.029	0.02	0.006	0.008	0.011	0.008	0.012	0	0.007	0	0.008	0.009	0.094	0.045	0.024	0.012	0	0	0.022	0.007	0.167	0.248	0.263	0.309	0.35	0.028	0.071	0.069	0.048	0.069	0.048	0.417	0.251	0.225	0.257	0.276	0.134	0.472	0.191
FeO	7.462	7.715	7.5	7.254	7.296	7.328	7.483	7.179	7.136	7.14	7.081	7.103	7.162	7.787	7.759	7.881	7.728	7.448	7.504	7.334	7.641	7.586	7.564	11.301	11.158	11.64	11.995	12.291	9.654	10.66	9.891	9.973	9.891	9.973	12.07	11.123	7.757	7.585	8.827	8.869	8.827	8.401
MnO	0.098	0.108	0.104	0.096	0.108	0.119	0.097	0.098	0.091	0.113	0.094	0.09	0.093	0.119	0.111	0.134	0.125	0.105	0.09	0.097	0.105	0.107	0.121	0.259	0.249	0.233	0.25	0.271	0.178	0.229	0.249	0.249	0.249	0.249	0.227	0.218	0.262	0.277	0.264	0.254	0.279	0.285
MgO	49.212	49.509	49.331	49.573	49.415	49.542	49.843	49.491	49.374	50.199	49.747	50.249	49.824	48.477	48.26	48.659	48.08	48.167	48	48.263	47.947	49.106	49.155	46.897	46.291	46.414	44.338	44.711	47.804	48.484	48.041	47.37	48.041	47.37	45.203	45.18	47.326	47.623	46.075	47.019	46.613	46.528
CaO	0.429	0.438	0.384	0.461	0.446	0.41	0.427	0.404	0.403	0.396	0.391	0.473	0.417	0.033	0.029	0	0.005	0.416	0.421	0.406	0.376	0.42	0.397	0.254	0.197	0.29	0.127	0.104	0.406	0.468	0.44	0.459	0.44	0.459	0.023	0.006	0.241	0.23	0.265	0.373	0.359	0.28
NiO	0.005	0.011	0.015	0.01	0.013	0.003	0.005	0.012	0.032	0.043	0.039	0.029	0.02	0.405	0.409	0.411	0.386	0.012	0.021	0.003	0.015	0.021	0.019	0.022	0.039	0.027	0.82	0.055	0.013	0.022	0.009	0.021	0.009	0.021	0.394	0.385	0.044	0.066	1.148	0.022	0.05	0.007
Na2O	0.007	0	0	0	0.016	0.004	0	0	0.012	0.014	0	0	0	0	0	0.019	0	0	0.015	0	0	0	0	0	0	0	0.024	0	0	0	0	0.017	0	0.017	0	0	0.014	0	0.018	0	0	0
K2O	0.006	0.001	0	0.001	0.006	0.01	0	0	0.005	0.007	0.009	0	0	0	0	0.008	0	0.005	0.014	0	0	0	0	0.001	0	0	0.017	0.015	0	0.01	0	0	0	0	0.002	0.002	0	0	0.004	0	0.003	0.001
V2O3	0.014	0.001	0.002	0.001	0	0.014	0.006	0	0.028	0	0.023	0.019	0.03	0.009	0.009	0.023	0	0	0	0.008	0	0.013	0.016	0	0.022	0.017	0.016	0.02	0.005	0.023	0.016	0.001	0.016	0.001	0.028	0.012	0.013	0.041	0.008	0	0.027	0.02
ZnO	0	0.02	0.015	0	0.019	0.02	0.024	0	0	0	0	0	0.015	0.005	0.026	0.005	0.001	0	0	0	0.012	0.056	0.021	0.004	0.038	0	0.037	0	0.02	0.007	0	0.028	0	0.028	0.004	0	0.012	0.023	0.05	0.001	0.007	0
Total	98.643	99.416	98.869	98.563	98.862	98.691	99.392	98.616	98.787	98.746	98.339	98.56	98.096	96.577	96.888	96.959	96.075	96.89	95.803	96.169	96.404	98.673	98.581	99.114	98.563	99.535	99.43	98.955	99.697	99.773	98.546	99.28	98.546	99.28	97.848	96.77	96.404	96.711	96.748	95.529	95.779	96.066
Si	1.01619	1.01318	1.01524	1.01037	1.01636	1.01187	1.01146	1.01543	1.01696	1.00048	1.00698	0.997798	1.00161	1.00132	1.01063	0.999045	1.00526	1.01717	1.00609	1.00953	1.01411	1.01467	1.01338	0.990278	0.996392	1.00091	1.01666	1.01076	1.01916	0.984602	1.00532	1.01495	1.00532	1.01495	0.999086	1.00762	1.01363	1.01692	1.01096	0.995685	1.00064	1.01764
Ti	0	0.000238458	0.000607851	0	0	0	0	0	0.00263221	0	0.000610939	0.000240477	0	0	0	0	0	0.000376005	0	0	0	0.000850091	0.00120202	0.00144468	0	0	0.000604772	0.000244698	0	0	0.00072291	0	0.00072291	0	0	0	0	0	0	0	0.00050025	0.00123922
Al	0	0.000546086	0.000461787	0	0	0	0	0	2.88418e-05	0.00144593	0.000348099	0.000202892	0	0	0	0	0	0	0.000776517	0	0	0	0	0.0127588	0.0166881	0.0107758	0.0119932	0.0217367	0.000635693	0.000729343	0	0.000553016	0	0.000553016	0.00491143	0.00352414	0.00813479	0.0026916	0.000568853	0.00066474	0	0.00421202
Cr	0.000174644	0.000713385	0.000271059	0.000563091	0.000387019	0.0001164	0.000154151	0.000213191	0.000154784	0.000232795	0	0.000136107	0	0	0	0	0	0.000474273	0.000240422	0	0	0.00042735	0.000136066	0.00329344	0.00491388	0.00516621	0.00613837	0.00692482	0.000542747	0.00138952	0.00134438	0.000937217	0.00134438	0.000937217	0.0083775	0.00507173	0.00448119	0.00509937	0.00554333	0.00271612	0.00954572	0.00382754
Fe(ii)	0.153152	0.157332	0.153587	0.148976	0.149329	0.150365	0.152507	0.147163	0.146033	0.146504	0.145744	0.146077	0.147981	0.164194	0.1628	0.165786	0.163653	0.155674	0.159017	0.154552	0.160748	0.155859	0.155511	0.235727	0.233839	0.24184	0.252031	0.257209	0.197927	0.220659	0.203831	0.20596	0.203831	0.20596	0.256474	0.237718	0.163404	0.159183	0.187514	0.190141	0.188816	0.178064
Mn	0.00203718	0.00223069	0.00215707	0.00199685	0.00223882	0.00247311	0.00200227	0.00203468	0.00188613	0.00234836	0.00195956	0.00187464	0.00194622	0.00254138	0.00235888	0.002855	0.00268104	0.0022228	0.00193165	0.00207033	0.00223728	0.00222658	0.00251959	0.00547176	0.00528525	0.00490305	0.00532021	0.00574386	0.00369618	0.00480105	0.00519716	0.00520825	0.00519716	0.00520825	0.00488538	0.00471881	0.00558992	0.00588785	0.00568014	0.00551533	0.00604456	0.00611822
Mg	1.80078	1.80006	1.80109	1.81512	1.80319	1.81241	1.81109	1.80877	1.80142	1.8364	1.82551	1.84243	1.83541	1.82241	1.80533	1.82495	1.81528	1.79493	1.81348	1.8133	1.79837	1.79877	1.80177	1.74405	1.72961	1.71927	1.66093	1.66815	1.74736	1.78931	1.76508	1.74414	1.76508	1.74414	1.71248	1.72151	1.77742	1.78189	1.74505	1.7972	1.77768	1.75825
Ca	0.0112809	0.0114439	0.010075	0.0121299	0.0116954	0.0107786	0.0111496	0.0106105	0.0105662	0.0104103	0.0103108	0.0124629	0.0110389	0	0	0	0	0.0111401	0.0114301	0.0109617	0.0101345	0.0110557	0.0104573	0.00678804	0.00528951	0.00771954	0.00341882	0.00278837	0.0106645	0.0124116	0.0116172	0.0121447	0.0116172	0.0121447	0	0	0.00650436	0.00618427	0.00721247	0.0102454	0.00983871	0.00760364
Ni	9.87195e-05	0.000215793	0.000295495	0.000197562	0.000255958	5.92171e-05	9.80277e-05	0.000236636	0.000629955	0.000848758	0.00077219	0.000573724	0.000397527	0.00821499	0.00825535	0.00831711	0.00786337	0.00024128	0.000428089	6.08161e-05	0.000303564	0.000415052	0.000375775	0.000441447	0.000786248	0.000539638	0.0165742	0.0011072	0.000256392	0.000438078	0.000178418	0.000417196	0.000178418	0.000417196	0.00805373	0.00791527	0.000891632	0.00133245	0.0234599	0.000453721	0.00102887	0.000142727
TOTAL	2.98372	2.98595	2.98379	2.98935	2.98345	2.98807	2.98846	2.98446	2.98031	2.99868	2.99223	3.00179	2.99839	2.99868	2.98937	3.00095	2.99474	2.98222	2.9934	2.99047	2.98589	2.98427	2.98535	3.00025	2.99281	2.99112	2.97367	2.97466	2.98025	3.01434	2.99329	2.98431	2.99329	2.98431	2.99427	2.98808	2.98006	2.97919	2.98598	3.00262	2.99409	2.9771
Fo	0.921618	0.919622	0.921426	0.92415	0.92352	0.923392	0.922333	0.924761	0.925014	0.926117	0.926065	0.926539	0.92539	0.917349	0.917282	0.916721	0.917302	0.920192	0.919383	0.921462	0.917949	0.920262	0.920547	0.880933	0.880904	0.876683	0.868251	0.86641	0.898253	0.890217	0.896475	0.894385	0.896475	0.894385	0.869741	0.878667	0.915807	0.917992	0.902971	0.904324	0.903984	0.90804
Fa	0.0783815	0.0803784	0.0785742	0.0758496	0.0764804	0.0766084	0.0776672	0.0752394	0.0749865	0.0738834	0.0739346	0.0734609	0.0746103	0.0826509	0.0827179	0.0832787	0.0826977	0.0798081	0.0806169	0.0785384	0.0820513	0.0797385	0.0794526	0.119067	0.119096	0.123317	0.131749	0.13359	0.101747	0.109783	0.103525	0.105615	0.103525	0.105615	0.130259	0.121333	0.084193	0.082008	0.0970287	0.0956761	0.0960163	0.0919602

## Sheet: Spl
Alag-Khadny
Sample No	M16-29													M16-12																	M16-20					M16-48
Type	Al-Cr	Al-Cr	Fe-Cr	Fe-Cr	Fe-Cr	Al-Cr	Al-Cr	Al-Cr	Al-Cr	Al-Cr	Fe-Cr	Mt	Mt	Mt	Fe-Cr	Mt	Fe-Cr	Al-Cr	Al-Cr	Al-Cr	Al-Cr	Al-Cr	Al-Cr	Al-Cr	Al-Cr	Al-Cr	Fe-Cr	Fe-Cr	Fe-Cr	Fe-Cr	Al-Cr	Al-Cr	Al-Cr	Fe-Cr	Fe-Cr	Al-Cr	Al-Cr	Al-Cr	Al-Cr	Al-Cr	Al-Cr	Al-Cr	Al-Cr	Al-Cr	Al-Cr	Al-Cr	Al-Cr	Fe-Cr	Fe-Cr
Point No	M1629-9	M1629-10	M1629-11	M1629-12	M1629-13	M1629-23	M1629-24	M1629-31	M1629-32	M1629-33	M1629-34	M1629-39	M1629-40	M1612-1	M1612-2	M1612-3	M1612-4	M1612-10	M1612-11	M1612-12	M1612-13	M1612-14	M1612-15	M1612-16	M1612-17	M1612-18	M1612-19	M1612-20	M1612-21	M1612-22	M1620-5	M1620-6	M1620-7	M1620-8	M1620-9	M1648-1	M1648-2	M1648-3	M1648-4	M1648-5	M1648-6	M1648-7	M1648-8	M1648-9	M1648-10	M1648-11	M1648-12	M1648-13	M1648-14
TiO2	0.062	0.059	0.294	0.285	0.238	0.039	0.03	0.051	0.068	0.047	0.12	0.06	0.03	0.043	0.107	0.007	0.096	0.04	0.049	0.02	0.035	0.028	0.032	0.007	0.046	0.048	0.114	0.086	0.094	0.077	0.037	0.036	0.053	0.185	0.18	0.014	0.02	0	0.027	0	0	0.001	0	0.035	0	0	0.016	0.002	0.008
Al2O3	35.928	36.045	1.43	1.244	0.9	35.56	36.073	33.697	33.391	35.828	3.783	0.009	0	0.203	0.387	0.024	0.248	37.814	37.185	37.057	36.884	36.94	36.482	36.817	36.983	36.718	1.519	2.233	1.318	1.584	36.46	36.919	32.704	2.331	2.986	30.041	28.095	27.156	27.073	26.972	27.078	27.127	26.907	27.358	28.19	28.395	29.79	4.314	2.581
Cr2O3	32.584	32.456	27.209	27.302	25.855	30.291	29.901	33.892	34.956	31.933	29.914	0.699	1.514	10.373	19.771	1.866	18.846	29.337	29.366	29.223	29.318	29.317	29.162	29.426	29.074	29.337	23.337	23.701	21.031	22.399	30.166	29.46	33.537	24.281	24.303	35.861	37.463	37.703	38.138	38.558	39.06	38.998	38.125	38.155	37.005	37.311	35.792	25.839	25.134
V2O3	0.155	0.149	0.12	0.112	0.093	0.119	0.138	0.147	0.133	0.146	0.108	0.07	0.046	0.081	0.099	0.052	0.12	0.148	0.153	0.172	0.179	0.19	0.186	0.185	0.179	0.18	0.16	0.151	0.136	0.079	0.139	0.15	0.147	0.123	0.113	0.207	0.197	0.205	0.206	0.203	0.22	0.202	0.2	0.199	0.212	0.189	0.205	0.172	0.183
Fe2O3	1.73622	1.32213	38.085	36.7388	40.1305	2.83572	2.1383	1.86441	1.05845	1.89238	32.8008	67.0261	65.7187	58.3563	47.9729	67.1514	49.2495	2.83533	3.42071	3.10922	2.83245	2.77041	2.65936	2.84997	2.60115	2.91331	43.1738	42.4224	44.9073	45.0207	2.11161	1.99376	2.66045	40.7933	39.2621	4.17764	4.00294	4.7445	4.23457	4.65857	4.56692	4.25213	4.75002	4.09569	4.49905	4.66909	4.38264	36.1786	39.455
FeO	13.6077	13.6173	24.1433	25.7927	26.6517	14.9523	14.1839	13.9033	14.2396	13.5921	22.6653	29.5238	29.2023	26.3253	23.9437	29.246	26.173	14.7136	14.3949	14.4382	14.4362	14.6141	14.306	14.4005	14.6124	14.7195	23.8241	24.5223	23.6253	14.1143	14.8039	15.0569	16.464	26.6073	24.6311	15.7108	15.688	15.4067	15.8015	15.778	16.0385	16.1147	15.6277	15.9535	15.6475	15.3135	15.4003	26.1168	27.2335
MnO	0.175	0.2	1.311	1.298	1.29	0.234	0.195	0.189	0.142	0.182	1.277	0.049	0.015	0.694	1.608	0.085	1.552	0.142	0.171	0.196	0.201	0.192	0.183	0.178	0.187	0.176	1.995	1.895	1.779	1.796	0.228	0.163	0.252	1.691	1.761	0.188	0.193	0.189	0.217	0.223	0.2	0.221	0.18	0.231	0.203	0.179	0.198	1.093	1.146
MgO	15.487	15.378	3.128	1.796	1.563	14.2	14.531	14.803	14.6	15.295	4.043	0.428	0.45	1.994	2.83	0.785	1.625	14.984	15.074	14.884	14.766	14.676	14.643	14.727	14.588	14.605	2.917	2.804	2.912	8.644	14.374	14.249	13.048	1.733	2.709	13.412	13.024	13.094	12.787	12.952	12.988	12.871	12.959	12.795	13.12	13.496	13.528	2.203	1.518
NiO	0.11	0.11	0.255	0.216	0.295	0.107	0.167	0.085	0.144	0.1	0.203	0.285	0.351	0.837	0.668	0.431	0.708	0.173	0.131	0.118	0.137	0.075	0.113	0.179	0.177	0.136	0.51	0.358	0.516	0.618	0.105	0.111	0.049	0.127	0.094	0.137	0.136	0.099	0.129	0.142	0.148	0.123	0.098	0.098	0.098	0.1	0.138	0	0.038
ZnO	0.21	0.195	0.336	0.408	0.401	0.194	0.212	0.226	0.186	0.234	0.531	0.025	0	0.027	0.201	0	0.163	0.22	0.245	0.179	0.199	0.262	0.147	0.258	0.184	0.179	0.305	0.344	0.216	0.219	0.309	0.275	0.264	0.378	0.34	0.204	0.231	0.174	0.244	0.22	0.188	0.179	0.235	0.252	0.164	0.21	0.179	0.529	0.472
TOTAL	100.055	99.5314	96.3113	95.1925	97.4172	98.532	97.5692	98.8577	98.918	99.2495	95.4451	98.1749	97.3269	98.9336	97.5876	99.6474	98.7805	100.407	100.19	99.3964	98.9877	99.0645	97.9133	99.0274	98.6315	99.0118	97.855	98.5167	96.5346	94.551	98.7335	98.4137	99.1785	98.2496	96.3792	99.9524	99.0499	98.7712	98.8571	99.7066	100.487	100.089	99.0817	99.1722	99.1386	99.8626	99.6289	96.4474	97.7685
Formula normalized to 24 cations
Ti	0.0107161	0.0102394	0.0675306	0.0669699	0.0549422	0.00688743	0.00531572	0.0090118	0.0120354	0.00818755	0.0272185	0.0141182	0.00711677	0.00986039	0.0245623	0.00161738	0.0220096	0.0068698	0.00844689	0.00347392	0.00610658	0.00488407	0.00564257	0.00122163	0.00805308	0.00838683	0.0258722	0.0193301	0.021662	0.0172782	0.00649325	0.00632685	0.00948342	0.0419941	0.0411529	0.0025114	0.0036507	0	0.00496449	0	0	0.000181885	0	0.00641084	0	0	0.00287853	0.000455189	0.00182478
Al	9.73007	9.80176	0.514669	0.458029	0.325544	9.83994	10.0152	9.32977	9.26021	9.77951	1.34449	0.00331825	0	0.072939	0.139198	0.00868889	0.0890903	10.176	10.044	10.0855	10.0834	10.0962	10.0796	10.0677	10.1448	10.0525	0.540162	0.786433	0.47591	0.556932	10.0257	10.1665	9.16913	0.829082	1.06968	8.44386	8.0355	7.81227	7.79984	7.71311	7.68903	7.73101	7.73588	7.85181	8.04984	8.03621	8.39768	1.53844	0.922458
Cr	5.91973	5.92065	6.5693	6.74345	6.27374	5.62288	5.56903	6.29494	6.50321	5.84721	7.13198	0.172885	0.377521	2.50025	4.77053	0.453189	4.54164	5.29606	5.32107	5.33541	5.37672	5.37523	5.40502	5.39791	5.3501	5.38797	5.56707	5.59957	5.0943	5.28312	5.56457	5.44216	6.30763	5.79344	5.84037	6.76182	7.18789	7.27616	7.37092	7.39683	7.4405	7.45575	7.35307	7.34601	7.08871	7.08371	6.76845	6.18145	6.02608
V	0.0285562	0.0275633	0.0293805	0.0280529	0.0228842	0.0224008	0.0260642	0.0276875	0.0250916	0.0271102	0.0261114	0.017557	0.0116317	0.0197986	0.0242239	0.0128069	0.0293255	0.0270938	0.0281136	0.0318451	0.0332895	0.0353266	0.0349594	0.0344142	0.0334027	0.0335238	0.0387055	0.0361773	0.0334068	0.0188956	0.0260016	0.0280997	0.0280369	0.0297609	0.0275379	0.0395806	0.0383298	0.0401191	0.0403741	0.039491	0.0424975	0.0391626	0.0391165	0.038853	0.0411826	0.0363879	0.0393123	0.0417268	0.0444934
Fe(iii)	0.300212	0.229549	8.75159	8.63653	9.26794	0.500998	0.379044	0.329581	0.187415	0.329795	7.44298	15.778	15.5966	13.3873	11.0169	15.5221	11.2959	0.487155	0.589925	0.540282	0.494393	0.483446	0.46912	0.497578	0.455565	0.50924	9.80232	9.53916	10.3531	10.1065	0.370728	0.350541	0.476238	9.26373	8.9801	0.749721	0.730979	0.871453	0.778933	0.850571	0.827981	0.773717	0.871931	0.750505	0.820266	0.843691	0.788798	8.23747	9.00332
Fe(ii)	2.61481	2.62738	6.16541	6.73819	6.84015	2.9357	2.79413	2.73131	2.80195	2.63242	5.71552	7.72345	7.70175	6.71135	6.11066	7.51263	6.67122	2.80941	2.7588	2.78813	2.80024	2.83404	2.8045	2.79402	2.84404	2.8593	6.01114	6.12784	6.05285	3.5211	2.88833	2.94193	3.27518	6.71473	6.2607	3.13326	3.18364	3.1448	3.23014	3.20141	3.2314	3.2586	3.18796	3.24874	3.17038	3.07509	3.08028	6.60834	6.90614
Mn	0.0340588	0.0390839	0.339081	0.343444	0.335325	0.0465324	0.0389065	0.0376054	0.0283001	0.0357005	0.326152	0.0129829	0.00400682	0.179197	0.41564	0.0221147	0.400663	0.0274612	0.0331928	0.0383348	0.0394887	0.0377114	0.036335	0.0349791	0.0368632	0.0346271	0.509821	0.479613	0.46163	0.453797	0.0450549	0.0322567	0.0507734	0.432223	0.45335	0.0379746	0.0396689	0.0390735	0.0449281	0.0458279	0.0408125	0.0452621	0.0371899	0.0476438	0.0416578	0.0364058	0.0401109	0.28011	0.294342
Mg	5.30573	5.28998	1.42414	0.836515	0.71519	4.97066	5.10351	5.18471	5.12199	5.28127	1.81769	0.19962	0.211596	0.906324	1.28767	0.359515	0.73846	5.10088	5.15065	5.12439	5.10653	5.07417	5.11788	5.09435	5.06213	5.05814	1.31219	1.24924	1.33014	3.84465	5.00001	4.96367	4.62771	0.779738	1.22764	4.76886	4.71219	4.76517	4.66029	4.68541	4.66543	4.64025	4.71314	4.64537	4.73937	4.8318	4.82411	0.993824	0.686318
nio	0.0204957	0.0205797	0.0631421	0.054716	0.0734137	0.0203705	0.0318994	0.0161915	0.0274752	0.0187794	0.0496369	0.0722934	0.0897624	0.206908	0.165305	0.107354	0.174984	0.0320299	0.0243443	0.0220952	0.0257677	0.014103	0.0214798	0.033676	0.0334044	0.0256166	0.124774	0.0867448	0.128188	0.149494	0.0198644	0.0210297	0.00945172	0.0310775	0.0231676	0.0264932	0.0267615	0.0195945	0.0255697	0.0279378	0.0289137	0.0241172	0.0193846	0.0193508	0.0192533	0.0194714	0.0267643	0	0.00934393
Zn	0.0356274	0.0332182	0.0757553	0.0941055	0.0908644	0.0336291	0.036872	0.0391986	0.0323137	0.0400122	0.118222	0.00577416	0	0.00607729	0.0452899	0	0.0366816	0.0370875	0.041456	0.0305185	0.0340803	0.0448586	0.0254428	0.0441959	0.0316186	0.0306994	0.0679436	0.0758951	0.0488591	0.0482362	0.0532279	0.0474393	0.0463675	0.0842227	0.0763004	0.0359202	0.0413883	0.0313576	0.0440374	0.0394113	0.0334422	0.0319573	0.0423247	0.0453073	0.0293372	0.0372315	0.03161	0.118178	0.105678
TOTAL	24	24	24	24	24	24	24	24	24	24	24	24	24	24	24	24	24	24	24	24	24	24	24	24	24	24	24	24	24	24	24	24	24	24	24	24	24	24	24	24	24	24	24	24	24	24	24	24	24
Mg# = Mg/(Mg + Fe2+)	0.66987	0.668149	0.187645	0.110435	0.0946601	0.628691	0.646207	0.654964	0.646394	0.667359	0.24129	0.0251948	0.0267391	0.118976	0.174049	0.0456693	0.0996615	0.644841	0.651202	0.64763	0.645843	0.641633	0.646002	0.645805	0.640276	0.638861	0.17918	0.169341	0.180162	0.521963	0.633848	0.627867	0.585571	0.104042	0.16394	0.603491	0.596795	0.602426	0.590625	0.594081	0.590798	0.587459	0.596517	0.58846	0.599181	0.611087	0.610307	0.130729	0.0903946
Cr# = Cr/(Cr+Al)	0.378262	0.376574	0.927347	0.936398	0.95067	0.363639	0.357349	0.402884	0.412551	0.37418	0.841386	0.981168	1	0.971654	0.971648	0.981188	0.980761	0.342299	0.346309	0.345985	0.34778	0.347429	0.349057	0.349028	0.345281	0.348951	0.911554	0.87685	0.914562	0.904636	0.356925	0.348662	0.407555	0.874809	0.845199	0.444691	0.472161	0.482234	0.485864	0.489534	0.491787	0.490938	0.487315	0.48336	0.468256	0.468502	0.446287	0.800718	0.867244
Fe# = Fe3+/(Fe3+ + Cr + Al)	0.0188221	0.01439	0.552654	0.545304	0.584093	0.0313834	0.0237447	0.0206578	0.0117496	0.0206684	0.46754	0.988956	0.976367	0.838778	0.691729	0.971104	0.709247	0.0305251	0.0369743	0.0338497	0.0309877	0.0303008	0.029405	0.0311704	0.0285612	0.0319279	0.616128	0.598999	0.650184	0.633773	0.0232271	0.0219648	0.0298526	0.583129	0.565136	0.0469885	0.0458168	0.0546027	0.0488369	0.0532922	0.0518866	0.0484771	0.0546292	0.0470586	0.0513989	0.0528509	0.0494392	0.516218	0.564406
Note: Fe-Cr - ferri-chromite, Al-Cr- primary Sp1, Mt- magnetite;
Khara-Nur
Group	Ol-Opx-Tr rocks																							Ol-Atg-Di rocks
Sample No	S18-128													S18-15					S18-127					S12-22															S12-08
Type	Fe-Cr	Al-Cr	Al-Cr	Al-Cr	Al-Cr	Fe-Cr	Fe-Cr	Mt	Al-Cr	Al-Cr	Fe-Cr	Fe-Cr	Fe-Cr	Al-Cr	Al-Cr	Al-Cr	Al-Cr	Mt	Fe-Cr	Al-Cr	Al-Cr	Al-Cr	Al-Cr	Al-Cr	Al-Cr	Al-Cr	Al-Cr	Al-Cr	Al-Cr	Al-Cr	Mt	Al-Cr	Al-Cr	Fe-Cr	Fe-Cr	Mt	Mt	Mt	Mt	Mt	Mt	Mt	Fe-Cr	Mt	Fe-Cr	Fe-Cr	Mt	Mt	Mt
Point No	S18-128-7	S18-128-17	S18-128-18	S18-128-19	S18-128-20	S18-128-21	S18-128-22	S18-128-31	S18-128-44	S18-128-45	S18-128-46	S18-128-47	S18-128-48	S18-15-1	S18-15-2	S18-15-3	S18-15-4	S18-15-7	S18-127-3	S18-127-8	S18-127-9	S18-127-15	S18-127-16	S12-22-1	S12-22-2	S12-22-3	S12-22-4	S12-22-5	S12-22-6	S12-22-7	S12-22-8	S12-22-12	S12-22-13	S12-22-14	S12-22-15	S12-22-16	S12-22-23	S12-22-24	S12-8-1	S12-8-2	S12-8-3	S12-8-4	S12-8-6	S12-8-7	S12-8-8	S12-8-17	S12-8-18	S12-8-27	S12-8-32
TiO2	0.18	0.028	0.017	0.006	0	0.027	0	0.06	0.011	0.039	0.06	0.011	0.115	0	0.054	0	0.033	0.05	0.044	0.056	0.061	0	0.056	0.038	0.057	0	0.024	0.005	0	0.009	0.027	0.019	0.057	0.032	0.022	0	0	0	0.009	0.04	0	0	0.063	0.036	0.081	0.063	0	0.013	0.023
Al2O3	3.987	25.267	25.428	27.296	26.59	4.766	4.628	0.021	25.2	25.112	7.136	5.292	8.028	13.888	14.156	14.687	15.225	0	1.374	21.201	20.928	25.138	24.901	31.851	31.522	32.971	32.434	19.445	20.794	21.674	0	33.286	32.7	3.554	1.975	0.12	0.081	0.081	0.053	0.036	0	0	0.091	0.018	0.041	0.094	0.053	0.061	0.031
Cr2O3	39.775	45.519	45.233	43.456	44.052	38.269	39.399	0.356	45.208	45.208	43.741	41.408	41.215	57.084	57.273	57.019	56.175	3.131	40.103	50.056	49.588	45.102	45.019	40.278	39.96	39.293	38.503	40.997	41.781	40.991	3.123	39.631	38.863	32.983	32.956	3.663	7.861	7.861	4.349	4.226	5.251	3.719	23.48	13.904	20.855	21.742	3.744	7.215	10.007
V2O3	0.230047	0.19143	0.179832	0.186235	0.175	0.166557	0.163	0.038	0.146597	0.152027	0.196349	0.187597	0.150336	0.174	0.196114	0.195	0.148792	0.055	0.240389	0.155859	0.170222	0.213	0.186859	0.211	0.252	0.236	0.214	0.188	0.241	0.185	0.065	0.177	0.206	0.209	0.184	0.074	0.125	0.125	0.074	0.032	0.081	0.012	0.081	0.087	0.069	0.109	0.05	0.041	0.093
Fe2O3	24.966	0.142961	0.192432	0.458988	0.0396006	26.9301	24.8388	66.8941	0.6086	0.556138	18.3312	22.6729	19.9216	0.0132129	0	0	0	64.7235	28.4515	0.0820454	0.270698	0	0	0.541042	1.12999	1.02488	0.778444	9.36457	6.94723	7.25786	66.024	0.685226	1.3682	32.8499	33.7168	64.292	59.2583	59.2583	64.2206	64.2012	63.0808	63.9563	44.6119	54.6109	47.3001	46.057	65.2043	61.0942	57.4216
FeO	22.6894	14.2794	14.3708	13.957	14.4264	20.9391	20.1349	28.0756	14.4944	13.8936	24.7867	23.3308	23.8806	15.5471	15.475	15.166	15.177	25.5798	20.263	14.7502	14.7504	15.663	15.384	15.6701	15.3402	15.0048	16.2295	22.9843	23.3146	23.095	29.7275	14.2384	13.7508	26.6152	26.348	29.0651	28.1556	28.1556	27.5723	27.4817	27.339	27.3041	23.5562	25.1306	24.0411	24.2037	27.8221	26.9176	25.3104
MnO	1.015	0.239	0.267	0.208	0.246	0.908	0.869	0.015	0.297	0.262	0.827	0.888	0.865	0.332	0.318	0.303	0.297	0.036	0.843	0.283	0.307	0.268	0.298	0.301	0.271	0.289	0.298	0.64	0.575	0.514	0.06	0.244	0.247	1.156	1.431	0.072	0.286	0.286	0.173	0.191	0.21	0.181	1.677	0.974	1.552	1.692	0.171	0.313	0.741
MgO	5.055	13.891	13.83	14.398	13.926	6.332	6.476	1.251	13.741	14.079	4.331	4.901	4.973	11.697	11.93	11.953	12.033	2.654	6.375	13.247	13.027	12.726	12.547	14.367	14.536	15.02	13.916	7.181	7.218	7.577	0.473	15.647	15.682	2.526	2.112	0.621	0.783	0.783	1.303	1.308	1.313	1.122	2.6	2.175	2.432	2.224	1.178	1.452	1.821
NiO	0.043	0.099	0.092	0.07	0.085	0.09	0.09	0.088	0.06	0.051	0.096	0.116	0.079	0.061	0.017	0.032	0.042	0.366	0.041	0.062	0.063	0.051	0.05	0.099	0.078	0.088	0.043	0.062	0.062	0.054	0.635	0.071	0.109	0.339	0.342	0.554	0.661	0.661	1.079	1.028	1.05	1.093	0.797	1.005	0.898	0.851	1.115	1.196	1.188
ZnO	0.575	0.166	0.133	0.203	0.088	0.52	0.557	0	0.16	0.171	0.812	0.605	0.774	0.073	0.146	0.118	0.205	0.016	0.452	0.114	0.175	0.195	0.233	0.242	0.26	0.252	0.301	1.02	0.929	0.957	0.022	0.19	0.189	0.474	0.427	0	0.02	0.02	0	0	0	0	0.828	0.341	0.606	0.715	0	0.012	0.253
TOTAL	98.5155	99.8227	99.7431	100.239	99.628	98.9477	97.1557	96.7986	99.9266	99.5237	100.317	99.4124	100.002	98.8693	99.5651	99.473	99.3358	96.6112	98.1869	100.007	99.3403	99.356	98.6749	103.598	103.406	104.179	102.741	101.887	101.862	102.314	100.157	104.189	103.172	100.738	99.5138	98.461	97.2309	97.2309	98.8329	98.5439	98.3247	97.3874	97.785	98.2814	97.8752	97.7507	99.3374	98.3148	96.8889
Formula normalized to 24 cations
Ti	0.0391107	0.0051002	0.00309772	0.00107724	0	0.00577031	0	0.0142245	0.00200474	0.00711815	0.0126605	0.00235543	0.0241403	0	0.0104503	0	0.00636659	0.0117302	0.00962885	0.0103951	0.0114167	0	0.0104038	0.00653158	0.00981623	0	0.00415346	0.000962234	0	0.00170367	0.00621965	0.0032093	0.00972392	0.00697661	0.00490891	0	0	0	0.00208467	0.00929686	0	0	0.0144691	0.00829478	0.0186366	0.0145181	0	0.00302024	0.00539925
Al	1.3574	7.21143	7.26012	7.67886	7.55855	1.59598	1.57455	0.00780085	7.19622	7.18161	2.35935	1.77556	2.64053	4.24801	4.29252	4.44695	4.60244	0	0.471137	6.16643	6.13727	7.26002	7.24865	8.57819	8.50593	8.77107	8.79503	5.8635	6.22789	6.42866	0	8.80961	8.74082	1.21409	0.690507	0.0439599	0.0299486	0.0299486	0.0192358	0.0131104	0	0	0.0327477	0.0064985	0.014781	0.0339418	0.0191726	0.0222058	0.0114026
Cr	9.08419	8.71515	8.66367	8.20091	8.40042	8.59678	8.99216	0.088713	8.66033	8.67303	9.70154	9.31996	9.09396	11.7132	11.6503	11.5815	11.3917	0.772097	9.22469	9.76671	9.75526	8.73811	8.79126	7.27705	7.2335	7.01214	7.004	8.29308	8.39453	8.15614	0.756183	7.03631	6.96876	7.55853	7.72948	0.900175	1.94977	1.94977	1.05886	1.03243	1.28522	0.921084	5.6683	3.3674	5.04364	5.26648	0.908566	1.76193	2.46923
V	0.0532801	0.0371674	0.034929	0.0356406	0.0338411	0.0379423	0.0377258	0.00960268	0.0284784	0.0295765	0.0441623	0.0428181	0.0336381	0.0362061	0.0404545	0.0401652	0.0305983	0.0137538	0.056074	0.0308387	0.0339585	0.0418478	0.0370034	0.0386582	0.0462588	0.0427089	0.0394763	0.038565	0.0491028	0.0373284	0.0159602	0.031868	0.0374592	0.0485696	0.0437628	0.0184414	0.0314403	0.0314403	0.0182706	0.00792777	0.0201045	0.00301388	0.0198295	0.0213671	0.0169221	0.0267744	0.0123044	0.0101533	0.0232709
Fe(iii)	5.4269	0.0260512	0.0350793	0.0824404	0.00718727	5.75775	5.39556	15.8654	0.110963	0.101546	3.86963	4.85696	4.18359	0.00258039	0	0	0	15.1907	6.22884	0.0152361	0.0506844	0	0	0.0930349	0.194682	0.174075	0.134774	1.80293	1.32848	1.37446	15.2154	0.11579	0.233504	7.16486	7.52644	15.0374	13.9888	13.9888	14.8816	14.9279	14.6947	15.0759	10.2502	12.5881	10.8874	10.618	15.06	14.1997	13.4853
Fe(ii)	5.48098	2.89167	2.9113	2.78588	2.90971	4.97513	4.86057	7.39987	2.93681	2.81921	5.81472	5.55416	5.57315	3.37419	3.32948	3.25817	3.25529	6.67182	4.92988	3.04402	3.0692	3.20963	3.17748	2.99446	2.93705	2.83219	3.12259	4.9176	4.95454	4.86041	7.61327	2.6738	2.60799	6.45111	6.53614	7.55474	7.38634	7.38634	7.10036	7.10119	7.07744	7.15253	6.01474	6.43748	6.1496	6.201	7.14117	6.95258	6.60565
Mn	0.248334	0.0490201	0.0547837	0.0420503	0.0502533	0.218509	0.212468	0.00400426	0.0609494	0.0538456	0.196495	0.21411	0.20446	0.0729782	0.069296	0.0659296	0.0645203	0.0095101	0.207729	0.0591524	0.0646985	0.0556225	0.0623398	0.058257	0.0525516	0.0552493	0.0580713	0.138688	0.12376	0.10956	0.0155632	0.0464081	0.0474472	0.283791	0.359541	0.0189547	0.0759916	0.0759916	0.045122	0.049987	0.0550616	0.0480226	0.433692	0.252702	0.402087	0.439051	0.044454	0.0818823	0.195871
Mg	2.1771	5.01529	4.99515	5.12383	5.00774	2.68231	2.78719	0.587861	4.96383	5.09339	1.81142	2.08015	2.06917	4.52601	4.57623	4.57827	4.60151	1.23416	2.76525	4.87405	4.83266	4.64936	4.62035	4.89478	4.9619	5.05458	4.7736	2.73923	2.73473	2.84298	0.215971	5.23867	5.30275	1.09159	0.934092	0.287781	0.366225	0.366225	0.598237	0.602584	0.606011	0.524018	1.18361	0.993333	1.10912	1.01586	0.539071	0.668649	0.847322
Ca	0.010072	0.0194397	0.018072	0.0135482	0.0166237	0.020735	0.0210666	0.0224902	0.0117881	0.0100346	0.0218371	0.0267769	0.0178771	0.012837	0.00354657	0.00666602	0.0087351	0.0925641	0.00967234	0.0124067	0.0127109	0.0101336	0.0100138	0.0181989	0.0143661	0.0159787	0.00795871	0.0127608	0.0126745	0.0109323	0.156441	0.012826	0.019887	0.0790441	0.0816139	0.138523	0.166813	0.166813	0.267296	0.255532	0.261486	0.275433	0.195765	0.247653	0.22097	0.209736	0.275308	0.29717	0.298262
Zn	0.122634	0.0296796	0.0237884	0.0357747	0.0156706	0.109084	0.118714	0	0.0286224	0.0306351	0.16818	0.127161	0.15948	0.0139879	0.0277337	0.0223817	0.038821	0.00368448	0.0970914	0.0207713	0.032149	0.0352796	0.0424892	0.0408291	0.0439505	0.0419956	0.0511312	0.192678	0.174301	0.177818	0.00497445	0.0315015	0.0316482	0.101436	0.0935213	0	0.00463237	0.00463237	0	0	0	0	0.18666	0.0771218	0.136859	0.161731	0	0.00273653	0.058297
TOTAL	24	24	24	24	24	24	24	24	24	24	24	24	24	24	24	24	24	24	24	24	24	24	24	24	24	24	24	24	24	24	24	24	24	24	24	24	24	24	24	24	24	24	24	24	24	24	24	24	24
Mg# = Mg/(Mg + Fe2+)	0.284288	0.634288	0.631782	0.64779	0.632494	0.350289	0.364445	0.0735955	0.628282	0.643706	0.237528	0.272474	0.270751	0.572898	0.578851	0.584228	0.585672	0.156104	0.359351	0.61556	0.611586	0.591598	0.592518	0.620438	0.628172	0.640893	0.604544	0.35775	0.355655	0.369055	0.0275852	0.662077	0.670322	0.144722	0.125042	0.0366949	0.0472392	0.0472392	0.0777072	0.0782192	0.0788723	0.0682622	0.164428	0.133677	0.152798	0.140763	0.0701894	0.087735	0.113689
Cr# = Cr/(Cr+Al)	0.870001	0.547208	0.544071	0.516438	0.526376	0.84342	0.850989	0.919174	0.546167	0.547034	0.80438	0.839975	0.774977	0.733854	0.730755	0.722558	0.712242	1	0.951408	0.612981	0.613827	0.546196	0.548087	0.458968	0.459578	0.444278	0.443318	0.585811	0.574086	0.559222	1	0.444046	0.443599	0.861605	0.917992	0.953439	0.984872	0.984872	0.982158	0.987461	1	1	0.994256	0.998074	0.997078	0.993596	0.979334	0.987554	0.995403
Fe# = Fe3+/(Fe3+ + Cr + Al)	0.341992	0.00163304	0.00219811	0.00516473	0.000450157	0.360976	0.338019	0.993954	0.00694929	0.00636408	0.242907	0.304464	0.26282	0.00016164	0	0	0	0.951631	0.391144	0.000955338	0.00317906	0	0	0.00583354	0.0122179	0.0109088	0.00845837	0.112969	0.0832857	0.0861229	0.952655	0.00725423	0.0146461	0.44956	0.471983	0.940923	0.876024	0.876024	0.932449	0.934545	0.919573	0.942421	0.642595	0.78863	0.682774	0.667026	0.941972	0.888379	0.844629
Note: Fe-Cr - ferri-chromite, Al-Cr- primary Sp1, Mt- magnetite;
[truncated: 65 more columns]

## Sheet: Tr
Alag-Khadny
Sample No	M16-29	M16-48				M16-45
Point No	M1629-30	M1648-26	M1648-27	M1648-34	M1648-42	M1645-45	M1645-46
SiO2	55.435	55.81	55.227	54.921	55.123	55.467	56.96
TiO2	0.028	0.003	0	0	0	0.002	0
Al2O3	2.117	1.585	1.726	1.525	1.783	1.682	2.049
Cr2O3	0.525	0.334	0.313	0.355	0.289	0.222	0.227
FeO	1.808	1.505	1.512	1.443	1.452	1.017	0.987
MnO	0.043	0.06	0.054	0.037	0.054	0.024	0.025
MgO	23.696	22.943	23.098	23.003	23.242	24.185	24.044
CaO	11.273	10.216	10.262	10.401	10.104	13.675	11.607
Na2O	1.523	2.391	2.446	2.215	2.311	1.444	1.798
K2O	0.154	0.263	0.314	0.411	0.18	0.183	0.23
V2O3	0.02	0.033	0.015	0.01	0.008	0.096	0.068
NiO	0.102	0.031	0.063	0.025	0.073	0.018	0.049
ZnO	0.011	0	0.051	0	0	0	0.008
Total	96.735	95.174	95.081	94.346	94.619	98.015	98.052
Si	7.56667	7.76322	7.69892	7.71611	7.67547	7.62615	7.69362
Ti	0.00287456	0.000313865	0	0	0	0.00020682	0
Al	0.340543	0.25983	0.283563	0.252499	0.292586	0.272538	0.326162
Cr	0.0566533	0.03673	0.0344959	0.0394306	0.0318138	0.0241306	0.0242399
Fe(iii)	0.206359	0.175053	0.176252	0.169523	0.16906	0.00506535	0.111476
Fe(ii)	0	0	0	0	0	0.111856	0
Mn	0.00497082	0.00706838	0.00637545	0.00440251	0.00636802	0.00279461	0.00285983
Mg	4.82193	4.75779	4.8004	4.81803	4.8247	4.95726	4.84164
Ca	1.64847	1.52241	1.53261	1.56551	1.50726	2.01428	1.67959
Na	0.403022	0.644789	0.661063	0.603312	0.62385	0.384898	0.470824
K	0.0268133	0.0466654	0.0558363	0.0736565	0.0319708	0.0320945	0.0396276
Zr	0	0	0	0	0	0	0
TOTAL	15.0783	15.2139	15.2495	15.2425	15.1631	15.4313	15.19
Mg/(Mg+Fe2+)	1	1	1	1	1	0.977934	1
Fe3+/(Fe3++[6]Al)	1	0.883651	1	1	1	1	0.849274
Khara-Nur (Ol-Opx-tr rocks)
Sample No	S21-92	S21-91				S18-131	S18-128				S18-15
Point No	S21-92_28	S21-91_14	S21-91_15	S21-91_45	S21-91_46	S18-131_32	S18-128-11	S18-128-12	S18-128-36	S18-128-37	S18-15-13	S18-15-14
SiO2	57.828	57.862	58.928	56.978	57.46	59.845	54.61	55.718	51.161	53.846	56.984	56.254
TiO2	0.021	0.005	0.003	0.009	0.016	0	0	0	0	0	0.034	0
Al2O3	0.261	0.904	0.67	1.514	1.613	0.331	1.917	1.733	2.918	2.217	0.967	1.127
Cr2O3	0.025	0.417	0.373	0.609	0.587	0.389	0.705	0.634	0.731	0.766	0.555	0.624
FeO	1.261	1.614	1.617	1.572	1.627	1.255	1.334	1.459	1.58	1.431	1.669	1.524
MnO	0.045	0.036	0.07	0.024	0.035	0.049	0.037	0.047	0.027	0.035	0.048	0.054
MgO	24.077	24.478	24.438	24.671	24.712	24.042	23.455	23.629	24.817	23.541	22.244	22.154
CaO	12.818	10.741	11.578	12.412	11.929	12.005	13.572	12.577	11.937	11.854	12.645	12.811
Na2O	0.082	0.365	0.305	0.549	0.532	0.141	0.602	0.779	0.415	0.589	0.595	0.65
K2O	0	0.061	0.04	0.042	0.078	0.005	0.132	0.113	0.104	0.171	0.167	0.127
NiO	0.035	0.054	0.057	0.097	0.05	0.036	0.074	0.034	0.054	0.047	0.072	0.072
ZnO	0.011	0	0.001	0	0	0	0	0	0	0	0.032	0
Total	96.464	96.537	98.08	98.477	98.639	98.112	96.456	96.746	93.766	94.505	96.021	95.408
Si	7.90015	7.74407	7.82826	7.60758	7.61694	7.98131	7.58955	7.64485	7.11181	7.49576	7.93289	7.88814
Ti	0.00215779	0.000503313	0.000299748	0.000903803	0.00159524	0	0	0	0	0	0.00355999	0
Al	0.0420212	0.142585	0.104893	0.238229	0.251988	0.0520241	0.313976	0.280222	0.478032	0.363712	0.158648	0.186241
Cr	0.00270012	0.0441222	0.0391739	0.0642838	0.0615174	0.0410148	0.07746	0.0687714	0.0803348	0.0843016	0.0610824	0.0691752
Fe(iii)	0.144051	0.180627	0.179621	0.175507	0.180346	0.139957	0.155025	0.167391	0.183654	0.166573	0	0
Fe(ii)	0	0	0	0	0	0	0	0	0	0	0.194284	0.178694
Mn	0.00520653	0.00408053	0.00787554	0.00271387	0.00392936	0.00553454	0.00435496	0.00546148	0.00317866	0.00412638	0.00565925	0.00641289
Mg	4.90371	4.88401	4.83988	4.91078	4.88369	4.78016	4.85964	4.8333	5.14299	4.88553	4.61654	4.63125
Ca	1.87603	1.54008	1.64778	1.77543	1.69411	1.71526	2.02074	1.84873	1.7777	1.76786	1.8859	1.92454
Na	0.021718	0.0947059	0.078551	0.142108	0.136721	0.0364564	0.162199	0.207214	0.11184	0.158959	0.160585	0.176703
K	0	0.0104139	0.00677817	0.00715315	0.0131892	0.0008506	0.0234006	0.019777	0.018441	0.0303646	0.0296554	0.0227161
Zr	0	0	0	0	0	0	0	0	0	0	0	0
TOTAL	14.8977	14.6452	14.7331	14.9247	14.844	14.7526	15.2063	15.0757	14.908	14.9572	15.0488	15.0839
Mg/(Mg+Fe2+)	1	1	1	1	1	1	1	1	1	1	0.959615	0.962849
Fe3+/(Fe3++[6]Al)	1	1	1	1	1	0.80762	1	1	1	1	0	0
